1 **TITLE: Dynamic DNA methylation turnover in gene bodies is associated with enhanced gene**  
2 **expression plasticity**

3

4 **Authors:** Williams, Clara J.<sup>1</sup>, Dai, Dawei<sup>1</sup>, Tran, Kevin A.<sup>1</sup>, Monroe, J. Grey<sup>2</sup>, Williams, Ben P<sup>1</sup>.

5 <sup>1</sup>Department of Plant & Microbial Biology, University of California, Berkeley.

6 <sup>2</sup>Department of Plant Sciences, University of California, Davis.

7

8 Correspondence: [benwilliams@berkeley.edu](mailto:benwilliams@berkeley.edu)

1 **ABSTRACT**

2 **Background:** In diverse eukaryotes, DNA methylation is deposited within the coding regions of many  
3 genes, termed gene body methylation (GbM). Whereas the role of DNA methylation on the silencing of  
4 transposons and repetitive DNA is well understood, gene body methylation is not associated with  
5 transcriptional repression, and its biological importance has remained unclear.

6 **Results:** We report a newly discovered type of GbM in plants, which is under constitutive addition and  
7 removal by dynamic methylation modifiers in all cells, including the germline. Methylation at Dynamic  
8 GbM genes is removed by the DRDD demethylation pathway, and added by an unknown source of de  
9 novo methylation, most likely the maintenance methyltransferase MET1. We show that the Dynamic  
10 GbM state is present at homologous genes across divergent lineages (>100 million years), indicating  
11 evolutionary conservation. Furthermore, we demonstrate that Dynamic GbM is tightly associated with  
12 the presence of a promoter/regulatory chromatin state within the gene body, in contrast to other gene  
13 body methylated genes. Lastly, we find Dynamic GbM is associated with enhanced gene expression  
14 plasticity across development and diverse physiological conditions, whereas stably methylated GbM  
15 genes exhibit reduced plasticity.

16 **Conclusions:** This study proposes a new model for GbM in regulating gene expression plasticity,  
17 including a newly discovered type of GbM in which increased gene expression plasticity is associated  
18 with the activity of DNA methylation writers and erasers and the enrichment of a regulatory chromatin  
19 state. We propose that Dynamic GbM is a hallmark of genes that can navigate a greater landscape of  
20 transcriptional states by maintaining regulatory flexibility.

21

22 **KEYWORDS**

23 DNA methylation, DNA demethylation, gene body methylation, gene expression plasticity.

## 1 INTRODUCTION

2 In diverse eukaryote species, DNA methylation is important for transcriptional silencing of transposable  
3 elements [1,2], repressing recombination at repetitive regions [3] and establishing genomic imprinting  
4 [4,5]. DNA methylation is a reversible and dynamic mark, which can be added or removed by a number  
5 of writer or eraser enzymes [6]. Many of these writer pathways have evolved to promote highly stable  
6 inheritance of DNA methylation over cell divisions and reproductive generations [7,8]. For example, the  
7 enzyme MET1 (also known as DNMT1 in animals) acts on hemimethylated DNA at the replication fork,  
8 faithfully copying existing methylation patterns to the daughter strand at symmetrical CG sites [6].  
9 Consequently, the vast majority of methylated CG sites are highly stable and consistently methylated  
10 across all cells [9]. In plants, many additional writers also maintain and methylate DNA de novo at CG,  
11 CHG and CHH sites, including the CHROMOMETHYLASE (CMT) family and the DOMAINS-  
12 REARRANGED METHYLTRANSFERASE (DRM) family [6]. Additionally, a family of plant-specific DNA  
13 glycosylase enzymes (collectively named DRDD enzymes) act as methylation erasers, removing DNA  
14 methylation from thousands of loci within the genome [10]. This family is comprised of the enzymes  
15 DEMETER (DME) [11], REPRESSOR OF SILENCING 1 (ROS1) [12], and DEMETER-LIKE2&3  
16 (DML2/DML3) [13]. The DRDD pathway is critical for reproductive development [11,14,15], and also  
17 maintains epigenetic homeostasis by protecting transcribed genes from silencing by pathways targeting  
18 proximal repetitive DNA [12,16–20]. Additionally, the DRDD pathway can also act during somatic  
19 development to generate differences in the levels of DNA methylation between tissues [10].  
20  
21 These methylation writers and erasers together shape DNA methylation patterns across the genome,  
22 into two broad categories: 1) “heterochromatic” DNA methylation, in which cytosines are methylated in  
23 CG, CHG and CHH sequence contexts, abundant at repetitive DNA, heterochromatin and some  
24 intergenic sequences within euchromatin [6], and 2) “gene body” DNA methylation (GbM), in which the  
25 coding region of genes are methylated solely in the CG sequence context [9]. Whereas the function of  
26 heterochromatic DNA methylation is broadly understood, primarily functioning in the transcriptional  
27 silencing of repetitive DNA [1,21,22], or the potent regulation of certain specialized target genes

1 [17,18,23,24], the functional role of GbM has remained more enigmatic [9,25,26]. GbM is associated  
2 with moderate-to-highly expressed genes [26,27], is inherited with high accuracy [28] and is conserved  
3 at homologous target genes across lineages [25]. However, a mechanistic link between GbM and gene  
4 regulation has been difficult to establish. Some lineages have dispensed with GbM altogether [9],  
5 raising questions about its necessity for gene regulation. Indeed, DNA methylation writer mutants or  
6 naturally-occurring genomes with reduced GbM do not display widespread changes to the  
7 transcriptional output of GbM genes, or strongly perturbed phenotypes [27,28]. Why GbM occurs in so  
8 many eukaryotic genomes, and at conserved genes in distinct lineages is therefore yet to be fully  
9 resolved.

10

11 The majority of GbM genes in the genome exhibit consistent methylation of CGs within all cells. In this  
12 study, we show that a subset of GbM genes exhibit heterogeneous methylation patterns between cells,  
13 indicating dynamic modification to methylation during development. This dynamic methylation  
14 heterogeneity is due to the activity of both writer and eraser pathways in all cell and tissue types, is  
15 evolutionarily conserved, and represents a newly discovered epigenetic state associated with  
16 regulatory histone modifications not typically found within gene bodies. Lastly, we show that Dynamic  
17 GbM genes exhibit dramatically higher gene expression plasticity than their stably methylated  
18 counterparts, suggesting that active modification to GbM may permit a greater exploration of the gene  
19 expression landscape.

20

## 21 **RESULTS**

### 22 ***DNA demethylation targets a subset of gene bodies.***

23 We recently generated a quadruple somatic mutant (*drdd*) of the four active DNA demethylases (DRDD  
24 enzymes) in the model plant *Arabidopsis thaliana* [10]. Unlike previously studied DNA demethylation  
25 mutants, *drdd* mutants exhibited increased CG methylation at a subset of gene bodies. To understand  
26 this genic demethylation further, we compared the 581 genes most evidently targeted by DRDD to  
27 previously described gene-body methylated (GbM) genes [9] (Fig. 1A). These genes were identified

1 based on two cutoffs: the presence of a WT vs *drdd* differentially methylated region (DMR) within the  
2 gene body (see methods), and an additional filter requiring at least 5 CG dinucleotides (10 CG  
3 cytosines total) that gained >20% methylation in *drdd* mutants. We found that the genes targeted by  
4 DRDD were a mostly distinct group compared to previously identified GbM genes (Fig. 1B), exhibiting a  
5 number of different properties. Previously identified GbM genes exhibit high levels of CG methylation  
6 throughout the gene body (Fig. 1A, C), and each individual CG is consistently highly methylated across  
7 the majority of cells (Fig. 1A, E), much like the vast majority of methylated CGs in the genome (Fig.  
8 1D). As the methylation state of these methylated genes are stable across development, we hereafter  
9 refer to these genes as Stable GbM genes. In contrast, genes targeted by DRDD display reduced  
10 methylation overall, in large part due to the fact that the majority of methylated CGs are methylated in  
11 only a *subset* of WT cells (in *drdd* mutants, these CGs are methylated in all cells, much like Stable GbM  
12 genes (Fig. 1A,E)). We refer to these genes as Dynamic GbM genes, due to the active removal of  
13 methylation that is occurring during plant development. The intermediate methylation state of CGs  
14 within Dynamic GbM genes (methylated in 10-85% of cells) is unusual and distinct from the vast  
15 majority of the genome (Fig. 1D-E), as the methylation maintenance by MET1 typically copies existing  
16 methylation states during DNA replication to ensure consistency across cell populations.

17

### 18 ***DNA demethylation generates cellular heterogeneity in all tissues and cell types.***

19 As Dynamic GbM genes exhibit DNA demethylation in a subset of cells, we sought to determine the  
20 underlying developmental context of these methylation dynamics. It is possible that DRDD removes  
21 methylation in a specific subset of differentiated cell types within somatic tissues, or that the reduced  
22 methylation is developmentally specific to the tissue type (rosette leaves) of our sample. To test this,  
23 we assembled whole-genome methylation sequencing data from a number of studies that have defined  
24 the methylation states of a number of cell and tissue types within Arabidopsis [10,29–32], and  
25 examined the cellular heterogeneity of DNA methylation patterns of both Stable GbM and Dynamic  
26 GbM genes. To our surprise, we discovered that the intermediate methylation of Dynamic GbM genes  
27 was not specific to active demethylation of a specific tissue or cell type (Fig. 2A-B) within somatic

1 tissues, but rather a feature of all the tissue and cell types we examined. This suggested that the  
2 removal of methylation by DRDD is ubiquitous across somatic development. By contrast, and as  
3 expected, Stable GbM genes were consistently methylated in the majority of somatic cells (Fig. 2B). As  
4 Dynamic GbM genes show cellular heterogeneity in DNA methylation patterns (a signature of active  
5 demethylation) in all tissues, we next wished to examine if the stem cell population in shoot meristems  
6 and germline cells also display cellular heterogeneity, or if the Dynamic GbM state is restricted to  
7 somatic development. By analyzing the cellular heterogeneity of CG methylation in shoot apical  
8 meristem stem cells (labelled with the *CLV3* promoter [32]), meiocyte cells from the male gametophyte  
9 [31] and sperm cells [30], we clearly observe intermediate methylation of CG sites across cells in all  
10 cases (Fig. 2C-D). To confirm that the cellular heterogeneity of CG methylation was due to the active  
11 removal by the DRDD pathway, we next examined DNA methylation in sperm nuclei mutant for one or  
12 both of the major DRDD genes *DME* and *ROS1* [30]. In demethylase mutant sperm, Dynamic GbM CG  
13 methylation patterns were homogenous across 100% of cells, conclusively demonstrating that  
14 heterogeneity between cells in WT sperm is due to active demethylation by DME and ROS1 (Fig. 2C).  
15 Together, these data demonstrate that Dynamic GbM loci are actively demethylated in a subset of all  
16 cells in somatic, meristem and germline tissues, and consequently are not demethylated in a specific  
17 lineage or developmental context.

18

### 19 ***De novo methylation is required to maintain dynamic GbM***

20 As Dynamic GbM genes are demethylated in the germline, we reasoned that they must also be subject  
21 to *de novo* methylation to counteract DRDD activity. If Dynamic GbM genes are not also targeted by  
22 one or more methyltransferases, then DRDD activity would ultimately remove all methylation, and the  
23 methylation patterns of dynamic GbM loci would not be stable over inheritance. We observe Dynamic  
24 GbM in WT samples from multiple independent laboratories [10,23,33], as well as distinct ecotypes [34]  
25 (Figure S1), so the methylation patterns of Dynamic GbM loci must therefore be robust against many  
26 generations of inbreeding. To identify the methyltransferase pathway that counteracts DRDD to  
27 maintain Dynamic GbM, we examined Dynamic GbM methylation patterns in mutants of the major de

1 novo methyltransferase pathways, RNA-directed DNA methylation (RdDM) [33] and Chromomethylases  
2 2 and 3 (CMT2/CMT3) [33,35]. Unexpectedly, we observed no evidence that these *de novo* pathways  
3 act at Dynamic GbM loci, with quadruple *ddcc* mutants exhibiting near-identical methylation levels and  
4 cellular heterogeneity to wild-type (Fig. 3A-B). *De novo* methylation of Dynamic GbM loci must  
5 therefore occur by an unknown mechanism. We therefore hypothesized that the maintenance  
6 methyltransferase MET1 may exhibit *de novo* activity at these loci. *De novo* methylation by  
7 MET1/DNMT1 is not unprecedented – it has been observed in mammalian cells [36], and *de novo* CG  
8 methylation has been observed at an introduced transgene within *Arabidopsis* [37]. Recently, *de novo*  
9 CG methylation was also reported in inbred *ddcc* lines [38]. Heterozygous *met1* mutants lose the vast  
10 majority of gene body methylation [33], including at most Dynamic GbM genes (Fig. 3C). We therefore  
11 chose to exploit this system to perform a genetic experiment to test whether reintroduction of  
12 homozygous WT MET1 alleles is sufficient to incur *de novo* methylation at Dynamic GbM loci.  
13 Heterozygous *met1* mutants were self-fertilized, and two subsequent generations of WT-segregant  
14 (+/+) progeny were selected for whole genome methylation sequencing by enzymatic methyl-seq (EM-  
15 seq). As has been previously reported, the memory of DNA methylation patterns maintained by MET1  
16 is initially lost in WT progeny of heterozygous mutants [33]. Similarly, we did not see complete  
17 reintroduction of Dynamic GbM in WT segregant plants (Fig. 3C). While we did observe a modest gain  
18 in methylation at a subset of CGs within Dynamic GbM genes in two out of three wild-type segregant  
19 lines, this enrichment was not statistically significant (Fig. 3C). Furthermore, inbreeding WT segregant  
20 lines for an additional generation did not result in further restoration of methylation at Dynamic GbM loci  
21 (Fig. 3C). We then further assessed the number of putative *de novo* methylation events per CG across  
22 all cells (e.g. the presence of one or more methylated reads per CGs) at Dynamic GbM and Stable  
23 GbM gene bodies. As expected, CG methylation events were very rare at both types of GbM genes in  
24 homozygous *met1* mutants (Figure S2). In *met1* heterozygotes and WT-segregants, we observed that  
25 *de novo* methylation was approximately 25% more common at Dynamic GbM genes than Stable GbM  
26 genes (Figure S2). We also observed rare but heritable CG methylation events at individual GbM  
27 genes, which varied from individual CGs to near-WT restoration of methylation patterns (Figure S3).

1 Together, these results suggest that de novo methylation by MET1 at an unmethylated locus is rare. If  
2 MET1 does maintain the Dynamic GbM state through *de novo* methylation activity, then it likely occurs  
3 when MET1 is recruited to the replication fork by the presence of hemimethylated CGs, or adjacently  
4 methylated CGs. Our data do not conclusively prove that MET1 maintains the Dynamic GbM state and  
5 thus leaves open the possibility that unknown mechanisms could operate at these loci.

6

### 7 ***Dynamic GbM loci are conserved across distant lineages***

8 As Dynamic GbM loci are clearly maintained over many generations of inheritance and between  
9 divergent ecotypes of *Arabidopsis thaliana* (Fig. S1), we sought to determine whether the Dynamic  
10 methylation state was conserved over evolutionary time. Evolutionary conservation of the Dynamic  
11 GbM state in distant lineages would suggest that the targeting of methylation/demethylation pathways  
12 to these loci in all cells serves an adaptive benefit. We isolated the methylation profiles of the most  
13 likely homologous genes from five additional genomes representing lineages that diverged from  
14 *Arabidopsis thaliana* between 6 and 117 million years ago [39,40]. Homologs were identified by blast  
15 homology and further filtered using two criteria: 1) only homologs that were classified as one-to-one  
16 orthologs by Inparanoid orthology analysis [41] were included, to avoid misidentification of homologs in  
17 gene families with duplications. 2) homologs possessing >1% non-CG methylation across the gene  
18 body were excluded, in order to remove genes targeted by de novo methylation pathways, which could  
19 impact CG methylation heterogeneity. Even in species that diverged >100 million years ago,  
20 intermediate methylation levels at individual CGs (representing cellular heterogeneity in methylation)  
21 were clearly observable at orthologous genes to the Dynamic GbM loci observed in *Arabidopsis* (Fig.  
22 4A). To verify that the frequency of intermediately methylated CGs at Dynamic GbM homologs (likely  
23 orthologs) were enriched relative to the number expected by chance, we compared homologs to the set  
24 of 581 Dynamic GbM genes against homologs to ten randomly selected sets of 581 genes. Both the  
25 number and proportion of heterogeneously methylated CGs within Dynamic GbM homolog gene bodies  
26 were substantially higher than the number and proportion observed across the gene bodies of randomly  
27 selected genes (Fig. 4B). For all species analyzed, the number of heterogeneously methylated CGs



1 was >2-fold higher than in randomly selected genes. These data strongly suggest that the loci targeted  
2 by DRRD and MET1 are similar across distant evolutionary lineages, and that the Dynamic GbM  
3 epigenetic state may offer an adaptive benefit to certain loci.

#### 4 5 ***Dynamic GbM is associated with a regulatory chromatin state***

6 As the Dynamic GbM state is conserved over evolutionary time, we sought to understand the biological  
7 purpose of this pattern of epigenetic modification. Similarly to previous studies on Stable GbM  
8 [9,27,28], we did not identify any strong associations between Dynamic GbM and broad patterns of  
9 gene expression. Although a small number of Dynamic GbM genes exhibited altered transcript  
10 abundance in *drdd* and *met1*<sup>+/-</sup> mutants (28 genes in *drdd* & 37 non-overlapping genes in *met1*<sup>+/-</sup>),  
11 overall transcriptional output (in standard growth conditions) was largely unaltered in the absence of  
12 Dynamic GbM (Figure S4). We also found that Dynamic GbM is associated with genes that exhibit a  
13 range of expression levels, whereas Stable GbM is predominantly associated with moderate-highly  
14 expressed loci (Figure S4). Additionally, while GO-term analysis identified a few statistically significant  
15 terms across GbM genes (Figure S5), there was no overall functional similarity that could account for  
16 more than 20% of total Dynamic GbM genes.

17 To better understand the possible function of Dynamic GbM beyond impacting gene expression  
18 levels, we examined the chromatin state of individual exons exhibiting Dynamic GbM, compared with  
19 exons exhibiting a Stable GbM state and genomic total exons as a control. Coding regions are typically  
20 associated with the histone marks H3K4me1 and H3K36me3, which consequently correlate with high  
21 expression levels, elevated DNA repair, and low mutation rates [42,43]. Both of these histone marks  
22 were enriched in total exons relative to the genomic average, and enriched further still in Stable GbM  
23 exons (Fig. 5A), consistent with their proposed function as stably expressed, functionally important (e.g.  
24 housekeeping) constitutive genes [25,27]. In contrast, Dynamic GbM exons exhibited reduced presence  
25 of these typical coding region histone marks, instead showing a significant enrichment in H3K4me2, as  
26 well as increased levels of H3K4me3 and histone acetylation. Exons are typically depleted for the  
27 histone mark H3K4me2 which is associated with a regulatory promoter chromatin state [44].

1 Consequently, we observed a much greater degree of overlap between Dynamic GbM genes and  
2 intergenic chromatin states (Fig. 5B-C) – including those normally associated with distal promoter  
3 sequences – compared to Stable GbM genes. The majority of genes in the genome, including Stable  
4 GbM genes, display a single peak of H3K4me2 at the promoter and transcriptional start site, which is  
5 replaced by H3K4me1 within the coding region. In Dynamic GbM genes, we observed elongated  
6 H3K4me2 domains, which encompassed the entire gene body, or occasionally additional distinct  
7 H3K4me2 peaks that coincided with the cytosines displaying dynamic methylation turnover (Fig. 5F).  
8 While Dynamic GbM genes are typically shorter than Stable GbM genes (Fig. 5D), the enrichment of  
9 H3K4me2 is independent of gene length (Fig. 5E). Together, these data show that Dynamic GbM is  
10 associated with a regulatory, or “promoter” chromatin state, suggesting a novel link between gene body  
11 methylation and transcriptional regulation.

12         Due to the presence of regulatory histone marks within the gene bodies of Dynamic GbM  
13 genes, we sought to understand the relationship between the Dynamic GbM state and transcription.  
14 Dynamic GbM genes do not show a substantial change in transcriptional output between WT and  
15 mutants with defective MET1 maintenance of GbM or DRDD demethylation of GbM (Figure S3). We  
16 therefore hypothesized that the Dynamic GbM state does not directly modulate transcriptional output  
17 (like RNA-directed DNA methylation or other silencing mechanisms) but rather facilitates a more flexible  
18 or open-ended regulatory structure, due to the presence of regulatory histone marks. To test this  
19 hypothesis, we leveraged large transcriptome datasets that compare transcript abundance across a  
20 wide range of tissues and cell types [45], biotic and abiotic stresses [46] and inter-individual variability  
21 under consistent conditions [47]. Using these datasets, we defined the coefficient of variation for both  
22 Stable and Dynamic GbM genes across conditions, to examine whether GbM patterns relate to the  
23 range, or plasticity of possible expression states a gene can exhibit. Stable GbM genes exhibited low  
24 variability across development and variable conditions, consistent with the observed correlative  
25 association between stable gene body methylation and consistently expressed housekeeping genes  
26 [25,27](Fig. 6A). In contrast, Dynamic GbM genes exhibit high variance in expression levels across  
27 developmental contexts, and physiological conditions, suggesting their altered methylation and/or

1 chromatin state confers increased expression plasticity. This increased variance was not observed  
2 across multiple individual WT replicates grown in consistent conditions (Fig. 6A), suggesting that high  
3 variance is not caused by high stochasticity in expression levels inherent to these loci. We therefore  
4 propose that the abundance of regulatory histone modifications within Dynamic GbM genes enables a  
5 greater range of possible expression states, in stark contrast to stable methylation, which promotes  
6 canalization towards a single, robust and consistent expression state (Fig. 6B). One prediction of this  
7 model is that disruption of methylation dynamics at dynamic GbM loci should impact gene expression  
8 plasticity. *drdd* mutants possess consistently high methylation levels at Dynamic GbM genes in the  
9 majority of all cells, similar to Stable GbM genes in WT (Fig. 1E). We therefore sought to test if *drdd*  
10 mutants exhibit reduced variance in Dynamic GbM expression levels compared to WT. Consistent with  
11 our model, *drdd* mutants exhibited a 30% lower standard deviation in Dynamic GbM gene expression  
12 compared to WT (Figure S6), whereas the standard deviation in Stable GbM gene expression was  
13 unchanged. This finding further supports our model – that the turnover of DNA methylation patterns at  
14 Dynamic GbM loci is associated with enhanced gene expression plasticity.

15 .

## 16 **DISCUSSION**

17 DNA methylation within the bodies of genes has been a well-known feature of eukaryotic  
18 genomes for several decades [26,27,48]. Despite this, the precise function of gene body methylation  
19 has remained unclear. A positive correlation between gene body methylation and robustly expressed  
20 genes has been well established in both animals and plants [27,48], with genes that occupy the  
21 extremes of the distribution of expression states typically being unmethylated in their gene body [27]. In  
22 this study, we have presented further evidence that gene body methylation functions by modulating the  
23 possible positions within “expression space” that genes can occupy. Stable gene body methylated  
24 genes (in which CGs are methylated in every cell) exhibit a dramatically lower gene expression  
25 plasticity across development and diverse physiological conditions than the genomic average (Fig. 6). A  
26 recent high-throughput genetic knockout study also supports this model. Genetic knockout of the CG  
27 methylation maintenance methyltransferase MET1 in 18 different wild-type *Arabidopsis* accessions

1 resulted in a dramatic increase in overall expression variability between genotypes, suggesting that CG  
2 methylation functions in canalizing transcriptional activity, or reducing variability [49]. Interestingly,  
3 studies of the responses of both animals and plants have also identified GbM as a correlate of gene  
4 expression plasticity. A study of two seagrass species showed that the genes that display low  
5 expression plasticity in response to environmental stress share properties of Stable GbM genes and  
6 are predicted to be methylated [50]. A similar association has been observed in corals transplanted  
7 between high and low fitness environments, where GbM is proposed to manage the balance between  
8 low/un-methylated environmentally-responsive genes and transcriptionally stable GbM genes [51].

9 Our study identifies a new sub-type of GbM locus within plant genomes, an exception that helps  
10 demonstrate the rule associating GbM with reduced gene expression plasticity. This sub-type of GbM,  
11 which we term Dynamic GbM, is distinguished by the targeting of methylated CGs by the DRDD DNA  
12 demethylation pathway in all cell and tissue types. Dynamic GbM genes display greatly elevated gene  
13 expression plasticity in comparison to their Stable GbM counterparts, strongly suggesting that  
14 enzymatic modification of the Stable GbM state disrupts its primary function in restricting expression  
15 plasticity. One consequence of this DNA demethylation activity is the generation of cellular  
16 heterogeneity in DNA methylation patterns and the production of unmethylated CGs within stem and  
17 gamete cells. In order to be stable over inheritance and evolution, Dynamic GbM loci must therefore  
18 also be re-methylated by one or more methyltransferase enzymes, most likely the maintenance  
19 methyltransferase MET1. The dynamic activity of demethylase and methyltransferase enzymes at  
20 these loci therefore functions as a constant source of methylation turnover, in stark contrast to the  
21 cellular consistency of Stable GbM genes. We therefore propose that dynamic methylation turnover in  
22 all cell types is a mechanism that could enable greater expression plasticity over the development of  
23 the entire organism. As the targeting and expression of methylation modifier pathways is not cell or  
24 tissue-type specific in plants, we reason that they target Dynamic GbM genes universally, so that  
25 increased gene expression plasticity is available when adaptively beneficial. Consequently, a Dynamic  
26 GbM gene may be targeted by methylation writers and erasers even in cell types or conditions in which  
27 the gene is not expressed.

1           While our study offers strong evidence for an association between GbM and gene expression  
2 plasticity, this proposed function is largely based on a correlative association, similar to prior  
3 hypotheses of GbM function. To move towards a mechanistic understanding of the roles of Dynamic  
4 and Stable GbM, we performed a detailed examination of the chromatin states of each. Our results  
5 show a striking association between Dynamic GbM and chromatin marks typically associated with  
6 regulatory regions, such as H3K4me2. This is consistent with the increased expression plasticity of  
7 Dynamic GbM genes, as genic H3K4me2 is likely to increase the extent to which regulators of  
8 transcription can target and modify expression of these loci [52,53]. H3K4me2 has also been shown to  
9 be associated with genes with high expression variability in Arabidopsis, as well as increased tissue-  
10 specificity across development [54], consistent with our proposed model. Intriguingly, gene-body  
11 H3K4me2 has also been reported in human cells, and – consistent with our model – is enriched within  
12 genes that show high cell-type specificity across development [55], aka elevated plasticity in possible  
13 expression states. This raises the possibility that properties of the Dynamic GbM epigenetic state could  
14 be conserved across eukaryote kingdoms. In contrast to Dynamic GbM genes, Stable GbM genes  
15 show the strongest genic enrichment of histone marks associated with polymerase II elongation and the  
16 “housekeeping gene” chromatin state, namely H3K4me1 and H3K36me3 [44]. Defining the precise  
17 molecular relationship between gene body methylation, dynamic methylation turnover, expression  
18 plasticity and a regulatory histone modification state is a key future extension of this research. One  
19 finding within our study points towards a causative role for DNA methylation dynamics in impacting  
20 gene expression variability. *drdd* mutants, which cannot generate methylation dynamics at GbM genes,  
21 exhibit a reduction in the variability of Dynamic GbM gene expression states (Figure S6). As gene  
22 expression plasticity is an important determinant of how organisms adapt to stress, variable  
23 environments, and climate change [51,56], discerning the precise ways in which epigenetic states  
24 impact plasticity is an important future question.

25

## 26 **CONCLUSIONS**

1 In this study, we define a new feature of the epigenetic landscape in plants. A subset of gene bodies  
2 within the genome are targeted by DNA methylation writers and erasers in all cells, which create a  
3 dynamic DNA methylation turnover. This dynamic DNA methylation state is associated with a  
4 “promoter-like” chromatin state, as well as enhanced gene expression plasticity. Our study also  
5 demonstrates a clear link between typical gene body methylation (which is stable across all cells) and a  
6 canalized expression state with low plasticity. Overall, our study offers a substantial advance towards  
7 understanding the functional role of enigmatic gene body methylation in eukaryotes.

8

## 9 **MATERIALS AND METHODS**

### 10 **Plant Growth Conditions**

11 All plants were grown on a 1:1 mix of potting compost and vermiculite in a Percival AR100L3 with 16-  
12 hour days at 21-22°C and 60% humidity.

### 13 ***met1* mutation segregation**

14 Seeds from a single self-fertilized heterozygous *met1-3* [57] plant (obtained from the Arabidopsis  
15 Biological Resource Center – stock number CS16394) were grown for 4 weeks in standard growth  
16 conditions as outlined above. A single rosette leaf was collected from individual plants and DNA was  
17 extracted as described [58]. The genotype of the *MET1* locus was then assayed using the following  
18 primers: METNF2, TAGCCAACAAGTTATCGCTTACTC; METNR2,  
19 TTCGCAAACCATTCTTCACAGAGC; TL-4, TAATTGCGTCGAATCTCAGCATCG. Plants that were  
20 identified as heterozygous for *met1-3* and homozygous for the WT *MET1* allele were self-fertilized and  
21 collected to repeat as described for an additional generation.

22

### 23 **DNA extraction and Enzymatic Methyl Sequencing (EM-Seq)**

24 Leaf tissue from 28-day old plants was collected and flash frozen in liquid nitrogen. Two leaves per  
25 sample were ground using a Qiagen TissueLyser II and immediately after 200 µl of CTAB was added  
26 and heated to 65°C for approximately 20 minutes. This was followed by the addition of 200 µl  
27 chloroform, 10 minute centrifugation and ethanol washes to isolate total genomic DNA. The DNA

1 concentration was quantified using a Qubit Flex fluorometer, and a diluted spike-in was added  
2 according to NEB recommendations (1  $\mu$ l diluted pUC19 (0.001 ng) control DNA and 1  $\mu$ l diluted  
3 unmethylated lambda DNA (0.02 ng) in 0.1X TE, pH 8.0 per 10–200 ng plant sample DNA). Genomic  
4 DNA samples with added spike-ins were sonicated to an average fragment size of 300bp using a  
5 Covaris S220 Focused Ultrasonicator (80s treatment, 140 peak power, 10 duty factor 200 cycles/burst).  
6 Subsequently, samples were incubated with an RNase cocktail and RNase was removed using a  
7 Qiagen spin column. EM-seq libraries were constructed following the NEBNext® Enzymatic Methyl-seq  
8 Kit protocol. Library quality was verified with a KAPA Library Quant Kit and fragment analyzer. The  
9 samples were pooled to a concentration of 4 ng/ $\mu$ l and 19.2 nM and sequenced using an Illumina  
10 NextSeq 2000 (paired-end 150 x 150 bp) 11 million average reads/sample. Further information on each  
11 EM-seq library sequenced in this study is available in Supplemental Table 1.

12

### 13 **Whole genome methylation analysis**

14 Mapping of whole genome bisulfite sequencing and EM-seq libraries was performed as described [10].  
15 In brief, reads were processed with TrimGalore (Babraham Bioinformatics), trimming 8bp from the 5'  
16 end of reads and enforcing a 3' end quality score of >25%. Reads were mapped to the Araport11  
17 genome using Bismark 0.20.1 [59], allowing for 1 mismatch per read in the seed region and removing  
18 PCR duplicates. Methylation values for each cytosine were calculated using the Bismark methylation  
19 extractor function. The efficiency of EM-seq conversion was verified by quantifying the percentage of  
20 methylation for reads mapped to the chloroplast. EM-seq conversion rates were >99.7% across all  
21 samples.

22

23 To classify Stable and Dynamic GbM genes, data from WT and *drdd* mutant bisulfite sequencing and  
24 EM-seq libraries [10] was used. Analysis was initially performed on a single high-depth EM-seq  
25 replicate to avoid inter-individual variation in methylation profiles. Subsequently, the classification of  
26 Dynamic GbM genes was also verified by pooling four bisulfite sequencing replicate libraries, showing  
27 that Dynamic GbM identification is robust against variation between replicates of the same genotype.



1 CGs exhibiting a methylation percentage  $\leq 10\%$  were classified as unmethylated, CGs  $\geq 85\%$  were  
2 classified as fully methylated and CGs methylated between 10-85% were classified as heterogeneously  
3 methylated, as each deduplicated read derives from an independent cell in the original sample.  
4 Dynamic GbM genes were identified based on two cutoffs: 1) the presence of a WT vs *drdd*  
5 differentially methylated region (DMR) within the gene body (DMRs were called based on aggregation  
6 of differentially methylated CGs within overlapping 200bp windows, as described in our previous work  
7 [10,24]). 2) Dynamic GbM genes required at least 5 CG dinucleotides (10 CG cytosines total) that  
8 gained  $>20\%$  methylation in *drdd* mutants. This second step removed genes possessing only a small  
9 number of heterogeneously methylated sites in an otherwise unmethylated or fully methylated gene  
10 body. Stable GbM genes were identified as described [9]. These two cutoffs resulted in a list of 581  
11 total Dynamic GbM genes.

12

13 The evolutionary conservation of Dynamic GbM was performed by identifying most likely homologs to  
14 the 581 Arabidopsis genes using BLAST homology from 5 additional species: *Arabidopsis lyrata*,  
15 *Capsella rubella*, *Theobroma cacao*, *Citrus clementina* and *Vitis vinifera*. Homologs were further filtered  
16 using two criteria: 1) only homologs that were classified as one-to-one orthologs by Inparanoid  
17 orthology analysis were included, 2) homologs possessing  $>1\%$  non-CG methylation across the gene  
18 body were excluded, in order to remove genes targeted by de novo methylation pathways. Additionally,  
19 most likely homologs were also identified for ten sets of 581 randomly selected genes, which were then  
20 averaged as a control group. The whole genome methylation profiles of each species were downloaded  
21 and remapped from other studies [39,40]. For each Dynamic GbM / random homolog, the number of  
22 heterogeneously methylated CGs was isolated using bedtools intersect. Both the number and density  
23 of heterogeneously methylated CGs was compared relative to average across 10 sets of randomly  
24 selected genes. Statistical significance was calculated using an unpaired two-tailed t-test.

25

26 **RNA-seq analysis**



1 Prior to mapping, adapters were trimmed using Trim Galore (Babraham Bioinformatics), trimming 9 bp  
2 from the 5'-end of reads, and enforcing a 3'-end quality of >25%. Reads were mapped to the Araport11  
3 genome using STAR, permitting 0.05 mismatches as a fraction of total read length and discarding  
4 reads that did not map uniquely [60]. Differentially expressed genes were identified by running htseq-  
5 count and DESeq2 [61], ensuring a minimum of two-fold change in expression and a Benjamini-  
6 Hochberg corrected P-value <0.05. GO term analysis was performed using agriGO v2.0 with default  
7 parameters [62].

8

### 9 **Chromatin state analysis**

10 Chromatin state classification for the entire Arabidopsis genome was obtained from Sequeira-Mendes  
11 et al [44]. The percentage and base-pair overlap between Stable and Dynamic GbM genes and each  
12 chromatin state was calculated using Bedtools intersect. In Figure 5, "Gene body" refers to chromatin  
13 states 3 and 7 combined, "Promoter (TSS)" refers to state 1, "Promoter (distal)" refers to state 2, and  
14 "Other intergenic" refers to states 4, 5, 8 and 9 combined.

15

### 16 **Expression variance analysis**

17 Gene expression counts for Stable GbM genes, Dynamic GbM genes and Total genes were obtained  
18 from the Bio-Analytic Resource for Plant Biology (BAR) Expression Browser platform [63]. The  
19 coefficient of variation for each gene was then calculated using all available data across tissues/cell  
20 types (305 data points) or physiological stress conditions (165 data points). Genes that were not  
21 represented in at least 75% of all tissues/conditions were excluded. 133 genes that were identified in  
22 both the Stable and Dynamic GbM gene groups were also excluded to avoid overlap between datasets.  
23 To calculate the variability in gene expression across identical conditions, RNA-seq from 14 wild-type  
24 replicates was obtained from a study by Cortijo et al [47], and the coefficient of variation of TPM values  
25 for each gene was calculated.

26

### 27 **DECLARATIONS**

1 **Ethics approval and consent to participate**

2 Not applicable

3

4 **Consent for publication**

5 Not applicable

6

7 **Availability of data and materials**

8 All high throughput sequencing data generated in this study will be made available (upon acceptance)

9 at the NCBI Gene Expression Omnibus.

10

11 **Competing interests**

12 The authors declare that they have no competing interests

13

14 **Funding**

15 CW is supported by an NSF Postdoctoral Fellowship in Biology (award #2209401).

16

17 **Authors' contributions**

18 CJW and KAT performed experiments. CJW, DD, GJM and BPW performed data analysis. BPW

19 conceived of the study and wrote the manuscript.

20

21 **Acknowledgements**

22 We are grateful to Annika Quist for her assistance with mapping RNA-seq data. We are thankful to Bob

23 Schmitz, Steve Jacobsen and PRV Satyaki for helpful feedback and discussion.

24

25 **FIGURE LEGENDS**

26 **Figure 1: Two distinct types of Gene body methylation (GbM) in the Arabidopsis genome. A)**

27 Genome browser snapshot showing representative example of a gene with Stable GbM and a gene

1 with Dynamic GbM in both WT and *drdd* mutants. Red bars represent methylated cytosines, and the  
2 height of the bar represents the percentage of cells in which a cytosine is methylated. B) A Venn  
3 diagram showing the number of Stable and Dynamic GbM genes and the overlap between the two  
4 groups. C) Box plot showing the overall percentage CGs methylation across entire genes (all CGs  
5 across all cells) with Stable or Dynamic GbM. Line = median, box = interquartile range, whiskers = 5<sup>th</sup>  
6 and 95<sup>th</sup> percentile. D) Violin plot showing the distribution of methylation heterogeneity levels of all CGs  
7 in the Arabidopsis genome, shown as the percentage of cells in which a CG is methylated. E) The  
8 proportion of fully methylated, heterogeneously methylated and unmethylated CGs within both Stable  
9 and Dynamic GbM gene bodies, in both WT and *drdd* mutants.

10

11 **Figure 2: Dynamic GbM genes exhibit methylation heterogeneity in all cell and tissue types.** A)  
12 Representative genome browser snapshot showing heterogeneously methylated CGs at a Dynamic  
13 GbM locus in a variety of cell and tissue types. (B and C) Violin plots showing the distribution of  
14 methylation heterogeneity levels of CGs within Stable and Dynamic GbM genes (methylated domains  
15 only) from various somatic cell and tissue types (B), and meristem and germ cells (C). Solid lines  
16 represent the median and dashed lines represent the interquartile range. All Dynamic GbM violins are  
17 significantly different to Stable GbM violins ( $p < 0.0001$ ), with the exception of *ros1; dme (+/-)* sperm  
18 cells. D) Proportion of fully methylated, heterogeneously methylated and unmethylated CGs across all  
19 tissue and cell types for both Stable and Dynamic GbM gene bodies.

20

21 **Figure 3: The Dynamic GbM state is maintained by MET1.** A) Representative genome browser  
22 snapshot of a Dynamic GbM locus in *met1*, *ddcc* and *drdd* mutants. Scale bar = 200 bp. B) Boxplots  
23 showing the cellular heterogeneity of CGs within Dynamic GbM genes in WT, *drdd* mutants and  
24 multiple de novo methylation mutants. C) Boxplots showing the cellular heterogeneity of CGs within  
25 Dynamic GbM genes in homozygous (-/-) and heterozygous (+/-) *met1* mutants, as well as multiple WT-  
26 segregant progeny from a selfed *met1* heterozygote. In B and C, horizontal lines = median, box =

1 interquartile range and whiskers = 95<sup>th</sup> percentile. Horizontal dashed lines represent the cutoffs used to  
2 identify heterogeneously methylated CGs (10-85% methylation across all cells).

3

4 **Figure 4: Evolutionary conservation of the Dynamic GbM state.** A) Representative Dynamic GbM  
5 gene homologs from six different species. Each red bar represents a single CG, and the bar height is  
6 the percent methylation heterogeneity across cells. Dashed lines represent the cutoffs used to call  
7 heterogeneously methylated cytosines (10-85% of cells). Rightmost panel: the estimated divergence  
8 time between species and *Arabidopsis thaliana*, obtained from TimeTree [64]. Points represent the  
9 median divergence time estimate, and vertical dashed lines represent the 95% confidence interval. B)  
10 Violin plots showing the number (left panel) and proportion (right panel) of heterogeneously methylated  
11 CGs across all homologs of Dynamic GbM genes, and ten identically-sized groups of randomly  
12 selected genes. Solid lines represent the median and dashed lines represent the interquartile range. \*p  
13 = <0.05, \*\*\*p = <0.0005.

14

15 **Figure 5: The association between Dynamic GbM and regulatory chromatin marks.** A) Boxplots  
16 showing the normalized read depth of ChIP-seq data of fourteen histone modifications (data from [42])  
17 within exons overlapping Dynamic GbM domains (blue), Stable GbM domains (green) or total exons  
18 (grey). Horizontal lines = median, box = interquartile range, whiskers = 5<sup>th</sup> and 95<sup>th</sup> percentiles. The red  
19 box highlights model gene body (H3K4me1) and promoter (H3K4me2) histone marks. B) The  
20 percentage overlap between Stable and Dynamic GbM gene bodies and four chromatin states  
21 identified by [44]. C) The total base pair overlap between Stable and Dynamic GbM gene bodies and a  
22 chromatin state typically enriched in distal promoters. D) Boxplot showing the distribution of gene body  
23 lengths of both Stable and Dynamic GbM genes. E) Boxplot showing the normalized read depth of  
24 H3K4me2 ChIP-seq data at Stable and Dynamic GbM genes separated into bins based on gene body  
25 length. F) Genome browser snapshot of raw H3K4me1 and H3K4me2 ChIP-seq data at Stable and  
26 Dynamic GbM genes. Tracks represent WT data from four independent studies. Data obtained from  
27 [65].

1

2 **Figure 6: Dynamic GbM is associated with increased gene expression plasticity.** A) Boxplots  
3 showing the coefficient of variation in transcript abundance for all genes, Stable GbM, and Dynamic  
4 GbM genes across development, diverse physiological stresses and WT replicates in standard growth  
5 conditions. Horizontal lines = median, box = interquartile range, whiskers = 5<sup>th</sup> and 95<sup>th</sup> percentile.  
6 \*\*\*p=<0.0005, \*p=<0.05. B) Schematic showing the proposed impact of Stable and Dynamic GbM on  
7 gene expression plasticity, represented as Waddington's landscape. Stable GbM genes exhibit low  
8 variance, suggesting canalization into a single, robust gene expression state. Dynamic GbM genes  
9 exhibit high variance, suggesting the capacity to access multiple possible gene expression states.

10

11 **Figure S1: Dynamic GbM is consistent across WT samples and different ecotypes.** Genome  
12 browser snapshots of four dynamic GbM genes in Col-0 WT Arabidopsis from three independent  
13 studies [10,33,66] and four additional ecotypes [34].

14

15 **Figure S2: De novo methylation events in *met1* mutants and WT segregants.** The rate of de novo  
16 CG methylation events per CG across all cells. Bars represent the mean, error bars represent standard  
17 deviation. Individual data points represent independent genetic lines that were sequenced. Chloroplast  
18 CG methylation is included a control for the false positive rate from incomplete conversion or  
19 sequencing errors.

20

21 **Figure S3: Example de novo methylation events in *met1* mutant segregants at GbM loci.** Genome  
22 browser snapshots of four Dynamic GbM genes in WT, *drdd*, *met1* heterozygotes (+/-) and three  
23 independent lines of WT-segregant progeny (+/+).

24

25 **Figure S4: RNA-seq analysis of Stable and Dynamic GbM genes.** A) Boxplots showing distribution  
26 of Log2 fold-change in transcript abundance for Stable and Dynamic GbM genes in WT v *met1*  
27 heterozygous mutants (which lose GbM) and WT v *drdd* mutants (which exhibit elevated GbM at

1 Dynamic GbM genes). Horizontal line = median, box = interquartile range, whiskers = 1<sup>st</sup> and 99<sup>th</sup>  
2 percentile. B) Distribution of Stable GbM genes across WT transcript abundance deciles. C) Distribution  
3 of Dynamic GbM genes across WT transcript abundance deciles. In B and C, 1 = highest expression  
4 decile, 10 = lowest expression decile.

5

6 **Figure S5: Enriched GO-terms in Dynamic GbM genes.** Symbol color is a heat map scale for  
7 statistical significance and symbol size is proportional to the number of genes for the GO term. The x  
8 axis indicates the enrichment ratio for DEGs relative to all genes with the GO term.

9

10 **Figure S6: Expression variance of Dynamic and Stable GbM genes in WT and drdd mutants.**

11 Barplots show the number of genes in the extreme ends of the expression distribution. Extreme high =  
12 top expression decile, extreme low = bottom expression decile + silent genes. Asterisks represent the  
13 total standard deviation in TPM expression values for each group.

14

## 15 REFERENCES

- 16 1. Miura A, Yonebayashi S, Watanabe K, Toyama T, Shimada H, Kakutani T. Mobilization of  
17 transposons by a mutation abolishing full DNA methylation in Arabidopsis. *Nature*. 2001;411:212–4.
- 18 2. Kazachenka A, Bertozzi TM, Sjoberg-Herrera MK, Walker N, Gardner J, Gunning R, et al.  
19 Identification, Characterization, and Heritability of Murine Metastable Epialleles: Implications for Non-  
20 genetic Inheritance. *Cell*. 2018;175:1259-1271.e13.
- 21 3. Yelina NE, Lambing C, Hardcastle TJ, Zhao X, Santos B, Henderson IR. DNA methylation  
22 epigenetically silences crossover hot spots and controls chromosomal domains of meiotic  
23 recombination in Arabidopsis. *Genes Dev*. 2015;29:2183–202.
- 24 4. Gehring M, Bubb KL, Henikoff S. Extensive Demethylation of Repetitive Elements During Seed  
25 Development Underlies Gene Imprinting. *Science*. 2009;324:1447–51.
- 26 5. Ferguson-Smith AC. Genomic imprinting: the emergence of an epigenetic paradigm. *Nat Rev Genet*.  
27 2011;12:565–75.
- 28 6. Law JA, Jacobsen SE. Establishing, maintaining and modifying DNA methylation patterns in plants  
29 and animals. *Nat Rev Genet*. 2010;11:204–20.
- 30 7. Hagmann J, Becker C, Müller J, Stegle O, Meyer RC, Wang G, et al. Century-scale Methylome  
31 Stability in a Recently Diverged Arabidopsis thaliana Lineage. *PLOS Genet*. 2015;11:e1004920.

- 1 8. Catania S, Dumesic PA, Pimentel H, Nasif A, Stoddard CI, Burke JE, et al. Evolutionary Persistence  
2 of DNA Methylation for Millions of Years after Ancient Loss of a De Novo Methyltransferase. *Cell*.  
3 2020;180:263-277.e20.
- 4 9. Bewick AJ, Ji L, Niederhuth CE, Willing E-M, Hofmeister BT, Shi X, et al. On the origin and  
5 evolutionary consequences of gene body DNA methylation. *Proc Natl Acad Sci. National Academy of*  
6 *Sciences*; 2016;113:9111–6.
- 7 10. Williams BP, Bechen LL, Pohlmann DA, Gehring M. Somatic DNA demethylation generates tissue-  
8 specific methylation states and impacts flowering time. *Plant Cell*. 2022;34:1189–206.
- 9 11. Choi Y, Gehring M, Johnson L, Hannon M, Harada JJ, Goldberg RB, et al. DEMETER, a DNA  
10 glycosylase domain protein, is required for endosperm gene imprinting and seed viability in arabidopsis.  
11 *Cell*. 2002;110:33–42.
- 12 12. Gong Z, Morales-Ruiz T, Ariza RR, Roldán-Arjona T, David L, Zhu J-K. ROS1, a Repressor of  
13 Transcriptional Gene Silencing in Arabidopsis, Encodes a DNA Glycosylase/Lyase. *Cell*.  
14 2002;111:803–14.
- 15 13. Penterman J, Zilberman D, Huh JH, Ballinger T, Henikoff S, Fischer RL. DNA demethylation in the  
16 Arabidopsis genome. *Proc Natl Acad Sci*. 2007;104:6752–7.
- 17 14. Ono A, Yamaguchi K, Fukada-Tanaka S, Terada R, Mitsui T, Iida S. A null mutation of ROS1a for  
18 DNA demethylation in rice is not transmittable to progeny. *Plant J*. 2012;71:564–74.
- 19 15. Gent JI, Higgins KM, Swentowsky KW, Fu F-F, Zeng Y, Kim DW, et al. The maize gene maternal  
20 derepression of r1 encodes a DNA glycosylase that demethylates DNA and reduces siRNA expression  
21 in the endosperm. *Plant Cell*. 2022;34:3685–701.
- 22 16. Yamamuro C, Miki D, Zheng Z, Ma J, Wang J, Yang Z, et al. Overproduction of stomatal lineage  
23 cells in Arabidopsis mutants defective in active DNA demethylation. *Nat Commun [Internet]*. 2014 [cited  
24 2014 Oct 16];5. Available from:  
25 [http://www.nature.com/ncomms/2014/140605/ncomms5062/full/ncomms5062.html?message-](http://www.nature.com/ncomms/2014/140605/ncomms5062/full/ncomms5062.html?message-global=remove)  
26 [global=remove](http://www.nature.com/ncomms/2014/140605/ncomms5062/full/ncomms5062.html?message-global=remove)
- 27 17. Williams BP, Pignatta D, Henikoff S, Gehring M. Methylation-Sensitive Expression of a DNA  
28 Demethylase Gene Serves As an Epigenetic Rheostat. *PLoS Genet*. 2015;11:e1005142.
- 29 18. Lei M, Zhang H, Julian R, Tang K, Xie S, Zhu J-K. Regulatory link between DNA methylation and  
30 active demethylation in Arabidopsis. *Proc Natl Acad Sci U S A*. 2015;112:3553–7.
- 31 19. Halter T, Wang J, Ameseffe D, Lastrucci E, Charvin M, Singla Rastogi M, et al. The Arabidopsis  
32 active demethylase ROS1 cis-regulates defence genes by erasing DNA methylation at promoter-  
33 regulatory regions. Zilberman D, Weigel D, Zilberman D, Zhu J-K, Ton J, editors. *eLife*. eLife Sciences  
34 Publications, Ltd; 2021;10:e62994.
- 35 20. Williams BP, Gehring M. Principles of Epigenetic Homeostasis Shared Between Flowering Plants  
36 and Mammals. *Trends Genet*. Elsevier; 2020;36:751–63.
- 37 21. Henderson IR, Jacobsen SE. Tandem repeats upstream of the Arabidopsis endogene SDC recruit  
38 non-CG DNA methylation and initiate siRNA spreading. *Genes Dev*. 2008;22:1597–606.



- 1 22. Gallego-Bartolomé J, Liu W, Kuo PH, Feng S, Ghoshal B, Gardiner J, et al. Co-targeting RNA  
2 Polymerases IV and V Promotes Efficient De Novo DNA Methylation in Arabidopsis. *Cell*.  
3 2019;176:1068-1082.e19.
- 4 23. Rigal M, Kevei Z, Pélissier T, Mathieu O. DNA methylation in an intron of the IBM1 histone  
5 demethylase gene stabilizes chromatin modification patterns. *EMBO J*. 2012;31:2981–93.
- 6 24. Williams BP, Gehring M. Stable transgenerational epigenetic inheritance requires a DNA  
7 methylation-sensing circuit. *Nat Commun*. 2017;8:2124.
- 8 25. Zilberman D. An evolutionary case for functional gene body methylation in plants and animals.  
9 *Genome Biol*. 2017;18:87.
- 10 26. Jones PA. Functions of DNA methylation: islands, start sites, gene bodies and beyond. *Nat Rev*  
11 *Genet*. Nature Publishing Group; 2012;13:484–92.
- 12 27. Zilberman D, Gehring M, Tran RK, Ballinger T, Henikoff S. Genome-wide analysis of Arabidopsis  
13 thaliana DNA methylation uncovers an interdependence between methylation and transcription. *Nat*  
14 *Genet*. 2007;39:61–9.
- 15 28. Picard CL, Gehring M. Proximal methylation features associated with nonrandom changes in gene  
16 body methylation. *Genome Biol*. 2017;18:73.
- 17 29. Kawakatsu T, Stuart T, Valdes M, Breakfield N, Schmitz RJ, Nery JR, et al. Unique cell-type-  
18 specific patterns of DNA methylation in the root meristem. *Nat Plants*. 2016;2:16058.
- 19 30. Khouider S, Borges F, LeBlanc C, Ungru A, Schnittger A, Martienssen R, et al. Male fertility in  
20 Arabidopsis requires active DNA demethylation of genes that control pollen tube function. *Nat*  
21 *Commun*. Nature Publishing Group; 2021;12:410.
- 22 31. Long J, Walker J, She W, Aldridge B, Gao H, Deans S, et al. Nurse cell–derived small RNAs define  
23 paternal epigenetic inheritance in Arabidopsis. *Science*. American Association for the Advancement of  
24 *Science*; 2021;373:eabh0556.
- 25 32. Gutzat R, Rembart K, Nussbaumer T, Hofmann F, Pisupati R, Bradamante G, et al. Arabidopsis  
26 shoot stem cells display dynamic transcription and DNA methylation patterns. *EMBO J*. John Wiley &  
27 *Sons, Ltd*; 2020;39:e103667.
- 28 33. Stroud H, Greenberg MVC, Feng S, Bernatavichute YV, Jacobsen SE. Comprehensive Analysis of  
29 Silencing Mutants Reveals Complex Regulation of the Arabidopsis Methylome. *Cell*. 2013;152:352–64.
- 30 34. Kawakatsu T, Huang SC, Jupe F, Sasaki E, Schmitz RJ, Urich MA, et al. Epigenomic Diversity in a  
31 Global Collection of Arabidopsis thaliana Accessions. *Cell*. 2016;166:492–505.
- 32 35. Zhong Z, Feng S, Duttke SH, Potok ME, Zhang Y, Gallego-Bartolomé J, et al. DNA methylation-  
33 linked chromatin accessibility affects genomic architecture in Arabidopsis. *Proc Natl Acad Sci*.  
34 *Proceedings of the National Academy of Sciences*; 2021;118:e2023347118.
- 35 36. Haggerty C, Kretzmer H, Riemenschneider C, Kumar AS, Mattei AL, Bailly N, et al. Dnmt1 has de  
36 novo activity targeted to transposable elements. *Nat Struct Mol Biol*. Nature Publishing Group;  
37 2021;28:594–603.



- 1 37. Zubko E, Gentry M, Kunova A, Meyer P. De novo DNA methylation activity of methyltransferase 1  
2 (MET1) partially restores body methylation in *Arabidopsis thaliana*. *Plant J Cell Mol Biol*. 2012;71:1029–  
3 37.
- 4 38. Briffa A, Hollwey E, Shahzad Z, Moore JD, Lyons DB, Howard M, et al. Unified establishment and  
5 epigenetic inheritance of DNA methylation through cooperative MET1 activity [Internet]. *bioRxiv*; 2022  
6 [cited 2022 Oct 20]. p. 2022.09.12.507517. Available from:  
7 <https://www.biorxiv.org/content/10.1101/2022.09.12.507517v1>
- 8 39. Seymour DK, Koenig D, Hagmann J, Becker C, Weigel D. Evolution of DNA Methylation Patterns in  
9 the Brassicaceae is Driven by Differences in Genome Organization. *PLOS Genet*. 2014;10:e1004785.
- 10 40. Niederhuth CE, Bewick AJ, Ji L, Alabady MS, Kim KD, Li Q, et al. Widespread natural variation of  
11 DNA methylation within angiosperms. *Genome Biol*. 2016;17:194.
- 12 41. Sonnhammer ELL, Östlund G. InParanoid 8: orthology analysis between 273 proteomes, mostly  
13 eukaryotic. *Nucleic Acids Res*. 2015;43:D234–9.
- 14 42. Monroe JG, Srikant T, Carbonell-Bejerano P, Becker C, Lensink M, Exposito-Alonso M, et al.  
15 Mutation bias reflects natural selection in *Arabidopsis thaliana*. *Nature*. Nature Publishing Group;  
16 2022;602:101–5.
- 17 43. Quiroz D, Lopez-Mateos D, Zhao K, Carbonell-Bejerano P, Yarov-Yarovoy V, Monroe JG. Biased  
18 mutagenesis and H3K4me1-targeted DNA repair in plants [Internet]. *bioRxiv*; 2022 [cited 2022 Nov 8].  
19 p. 2022.05.28.493846. Available from: <https://www.biorxiv.org/content/10.1101/2022.05.28.493846v2>
- 20 44. Sequeira-Mendes J, Aragüez I, Peiró R, Mendez-Giraldez R, Zhang X, Jacobsen SE, et al. The  
21 Functional Topography of the *Arabidopsis* Genome Is Organized in a Reduced Number of Linear Motifs  
22 of Chromatin States. *Plant Cell*. 2014;26:2351–66.
- 23 45. Klepikova AV, Kasianov AS, Gerasimov ES, Logacheva MD, Penin AA. A high resolution map of  
24 the *Arabidopsis thaliana* developmental transcriptome based on RNA-seq profiling. *Plant J*.  
25 2016;88:1058–70.
- 26 46. Waese J, Fan J, Pasha A, Yu H, Fucile G, Shi R, et al. ePlant: Visualizing and Exploring Multiple  
27 Levels of Data for Hypothesis Generation in Plant Biology. *Plant Cell*. 2017;29:1806–21.
- 28 47. Cortijo S, Aydin Z, Ahnert S, Locke JC. Widespread inter-individual gene expression variability in  
29 *Arabidopsis thaliana*. *Mol Syst Biol*. John Wiley & Sons, Ltd; 2019;15:e8591.
- 30 48. Hellman A, Chess A. Gene Body-Specific Methylation on the Active X Chromosome. *Science*.  
31 American Association for the Advancement of Science; 2007;315:1141–3.
- 32 49. Srikant T, Yuan W, Berendzen KW, Garrido AC, Drost H-G, Schwab R, et al. Canalization of  
33 genome-wide transcriptional activity in *Arabidopsis thaliana* accessions by MET1-dependent CG  
34 methylation [Internet]. *bioRxiv*; 2022 [cited 2022 Nov 3]. p. 2022.07.14.500095. Available from:  
35 <https://www.biorxiv.org/content/10.1101/2022.07.14.500095v1>
- 36 50. Entrambasaguas L, Ruocco M, Verhoeven KJF, Procaccini G, Marín-Guirao L. Gene body DNA  
37 methylation in seagrasses: inter- and intraspecific differences and interaction with transcriptome  
38 plasticity under heat stress. *Sci Rep*. Nature Publishing Group; 2021;11:14343.
- 39 51. Dixon G, Liao Y, Bay LK, Matz MV. Role of gene body methylation in acclimatization and adaptation  
40 in a basal metazoan. *Proc Natl Acad Sci*. National Academy of Sciences; 2018;115:13342–6.

- 1 52. Wang Y, Li X, Hu H. H3K4me2 reliably defines transcription factor binding regions in different cells.  
2 Genomics. 2014;103:222–8.
- 3 53. Liu L, Jin G, Zhou X. Modeling the relationship of epigenetic modifications to transcription factor  
4 binding. *Nucleic Acids Res.* 2015;43:3873–85.
- 5 54. Zhang X, Bernatavichute YV, Cokus S, Pellegrini M, Jacobsen SE. Genome-wide analysis of mono-  
6 , di- and trimethylation of histone H3 lysine 4 in *Arabidopsis thaliana*. *Genome Biol.* 2009;10:R62.
- 7 55. Pekowska A, Benoukraf T, Ferrier P, Spicuglia S. A unique H3K4me2 profile marks tissue-specific  
8 gene regulation. *Genome Res.* 2010;20:1493–502.
- 9 56. Rivera HE, Aichelman HE, Fifer JE, Kriefall NG, Wuitchik DM, Wuitchik SJS, et al. A framework for  
10 understanding gene expression plasticity and its influence on stress tolerance. *Mol Ecol.*  
11 2021;30:1381–97.
- 12 57. Johnson LM, Bostick M, Zhang X, Kraft E, Henderson I, Callis J, et al. The SRA Methyl-Cytosine-  
13 Binding Domain Links DNA and Histone Methylation. *Curr Biol.* 2007;17:379–84.
- 14 58. Edwards K, Johnstone C, Thompson C. A simple and rapid method for the preparation of plant  
15 genomic DNA for PCR analysis. *Nucleic Acids Res.* 1991;19:1349.
- 16 59. Krueger F, Andrews SR. Bismark: a flexible aligner and methylation caller for Bisulfite-Seq  
17 applications. *Bioinformatics.* 2011;27:1571–2.
- 18 60. Dobin A, Davis CA, Schlesinger F, Drenkow J, Zaleski C, Jha S, et al. STAR: ultrafast universal  
19 RNA-seq aligner. *Bioinformatics.* 2013;29:15–21.
- 20 61. Love MI, Huber W, Anders S. Moderated estimation of fold change and dispersion for RNA-seq  
21 data with DESeq2. *Genome Biol.* 2014;15:550.
- 22 62. Tian T, Liu Y, Yan H, You Q, Yi X, Du Z, et al. agriGO v2.0: a GO analysis toolkit for the agricultural  
23 community, 2017 update. *Nucleic Acids Res.* 2017;45:W122–9.
- 24 63. Toufighi K, Brady SM, Austin R, Ly E, Provart NJ. The Botany Array Resource: e-Northerns,  
25 Expression Angling, and promoter analyses. *Plant J.* 2005;43:153–63.
- 26 64. Kumar S, Suleski M, Craig JM, Kasprovicz AE, Sanderford M, Li M, et al. TimeTree 5: An  
27 Expanded Resource for Species Divergence Times. *Mol Biol Evol.* 2022;39:msac174.
- 28 65. Liu Y, Tian T, Zhang K, You Q, Yan H, Zhao N, et al. PCSD: a plant chromatin state database.  
29 *Nucleic Acids Res.* 2018;46:D1157–67.
- 30 66. Rigal M, Becker C, Pélissier T, Pogorelcnik R, Devos J, Ikeda Y, et al. Epigenome confrontation  
31 triggers immediate reprogramming of DNA methylation and transposon silencing in *Arabidopsis*  
32 *thaliana* F1 epihybrids. *Proc Natl Acad Sci. Proceedings of the National Academy of Sciences;*  
33 2016;113:E2083–92.

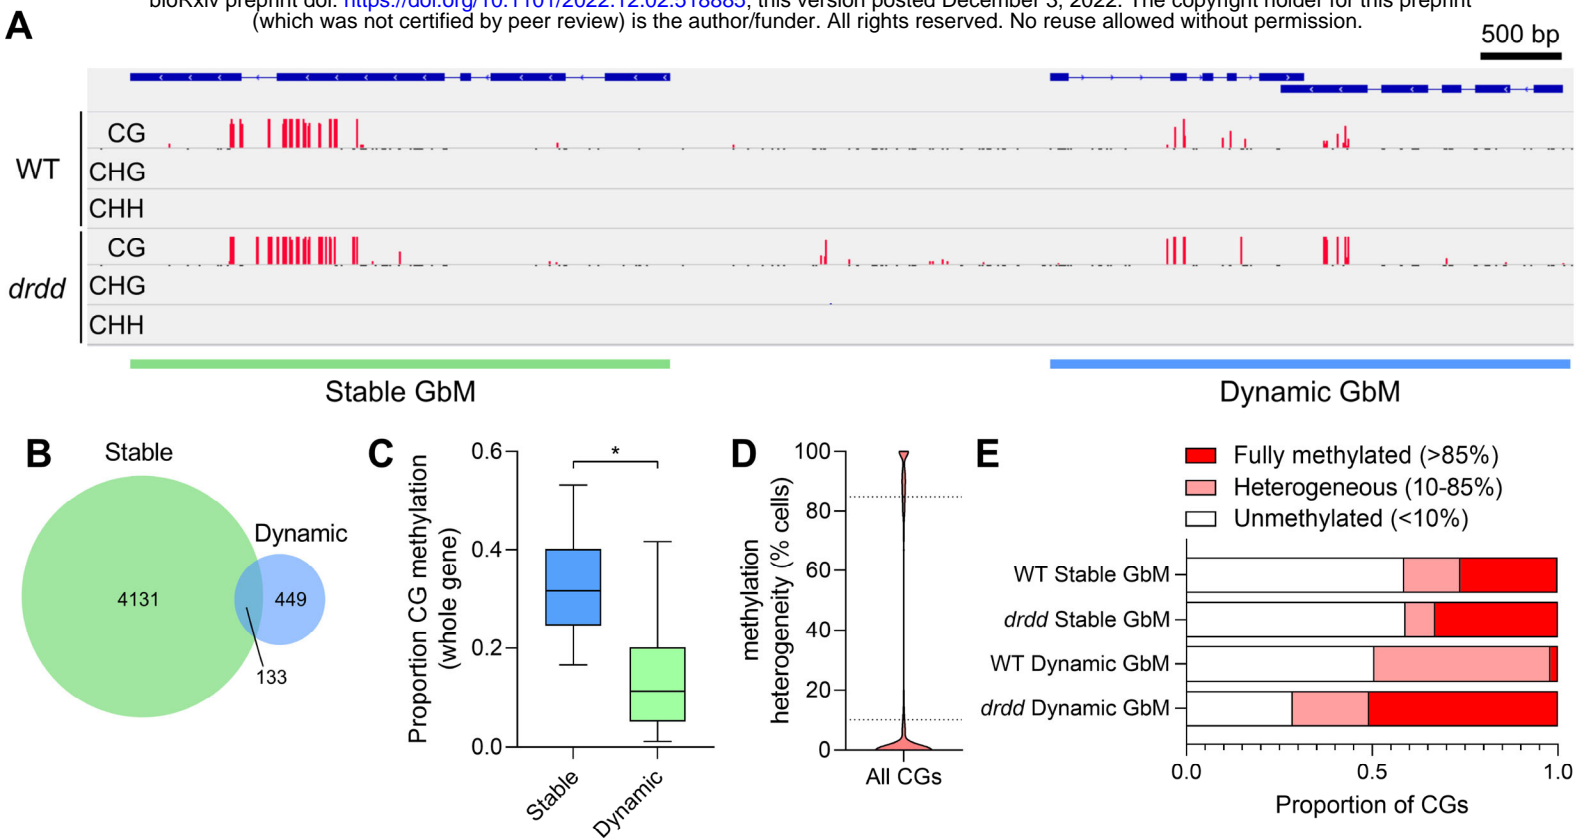

Figure 1

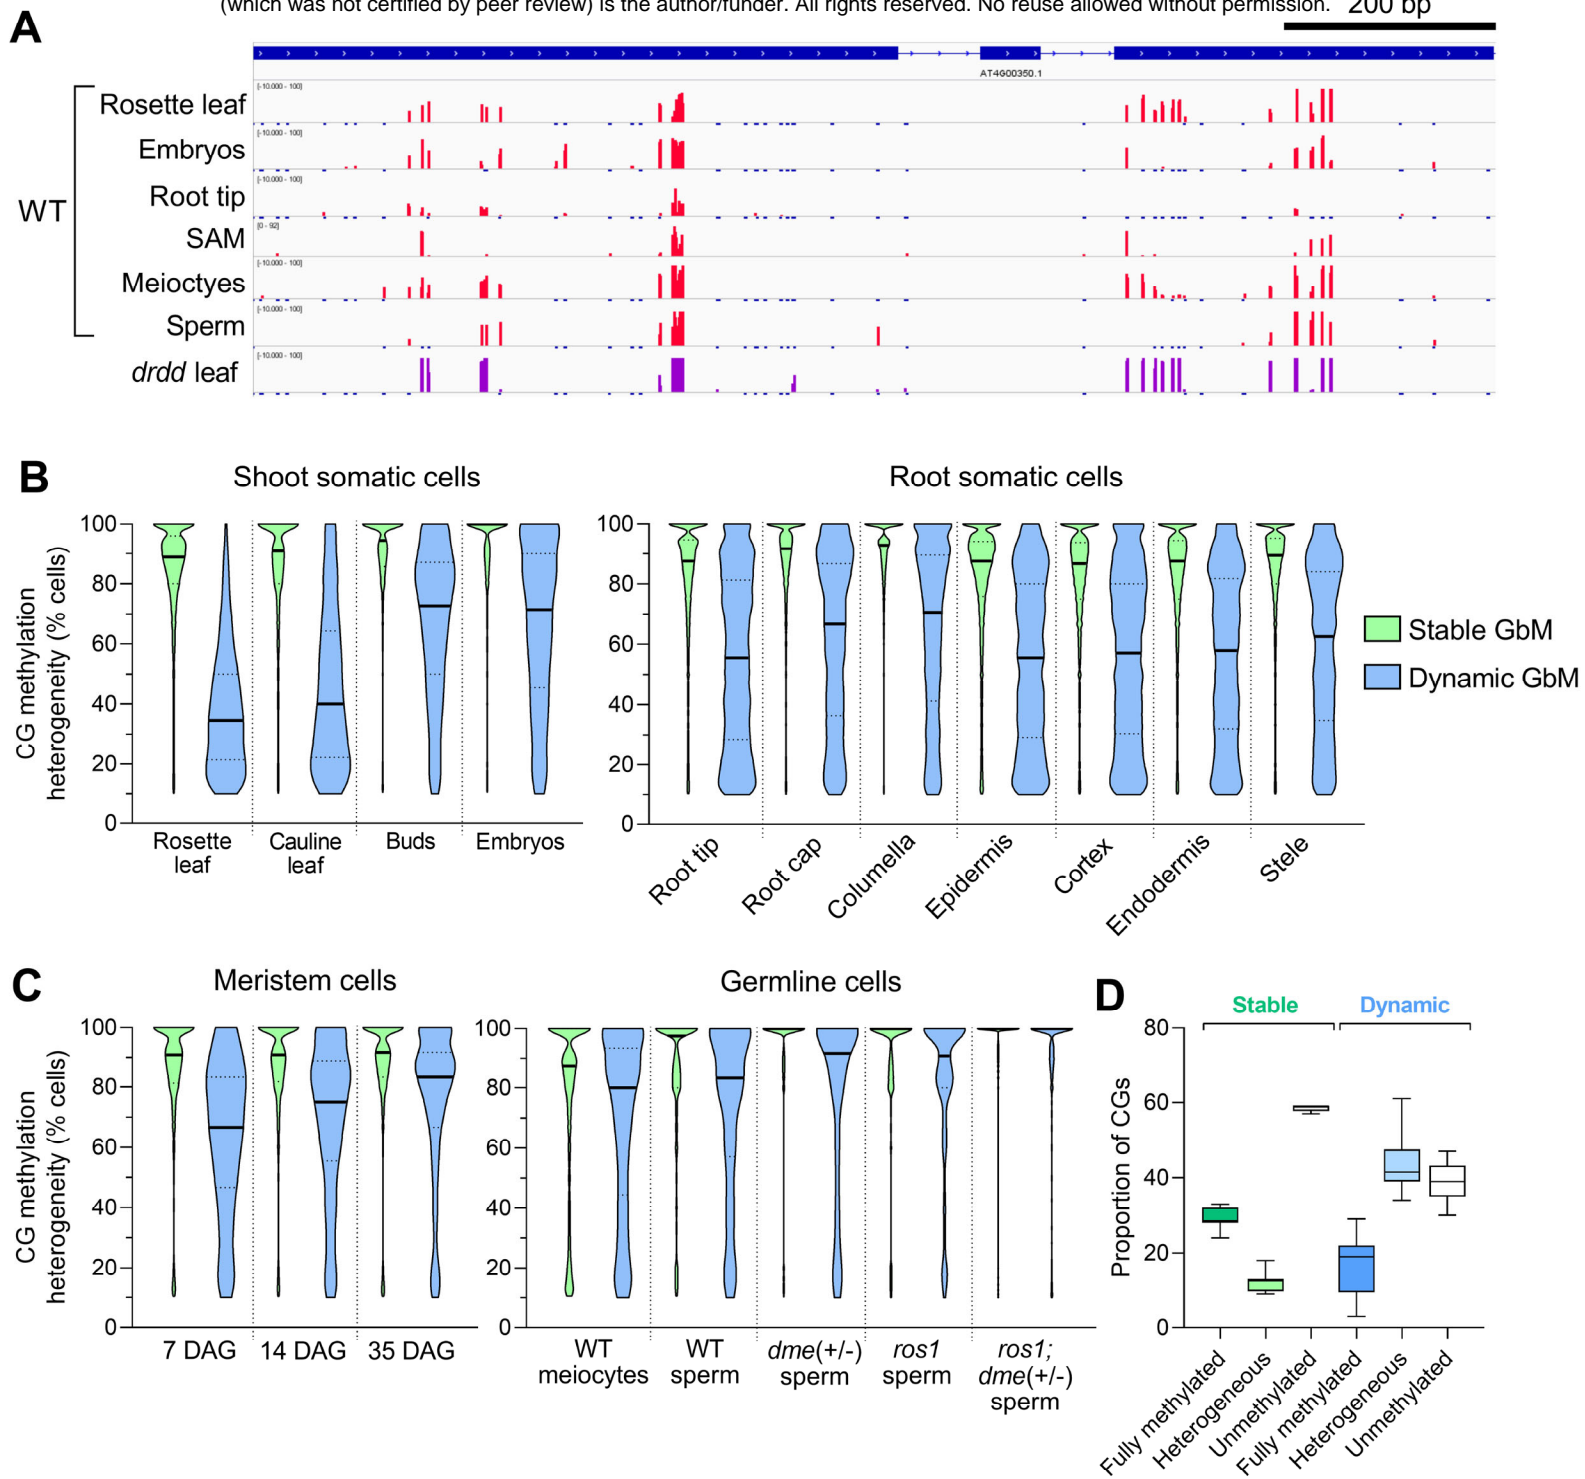

**Figure 2**

**A**

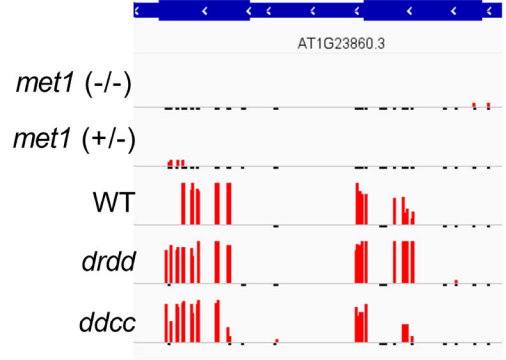

**B**

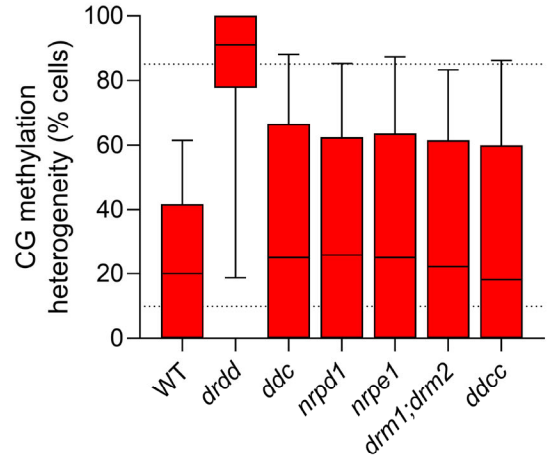

**C**

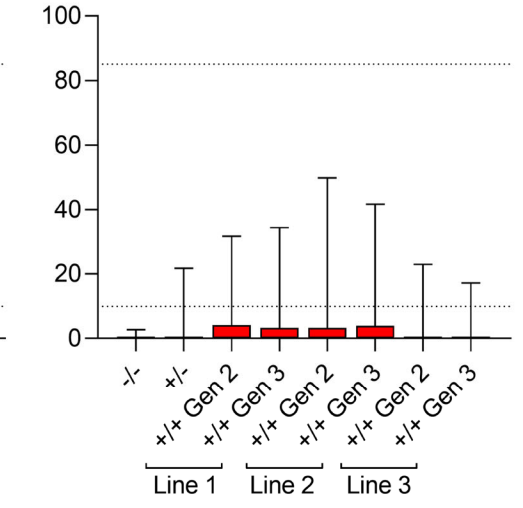

**Figure 3**

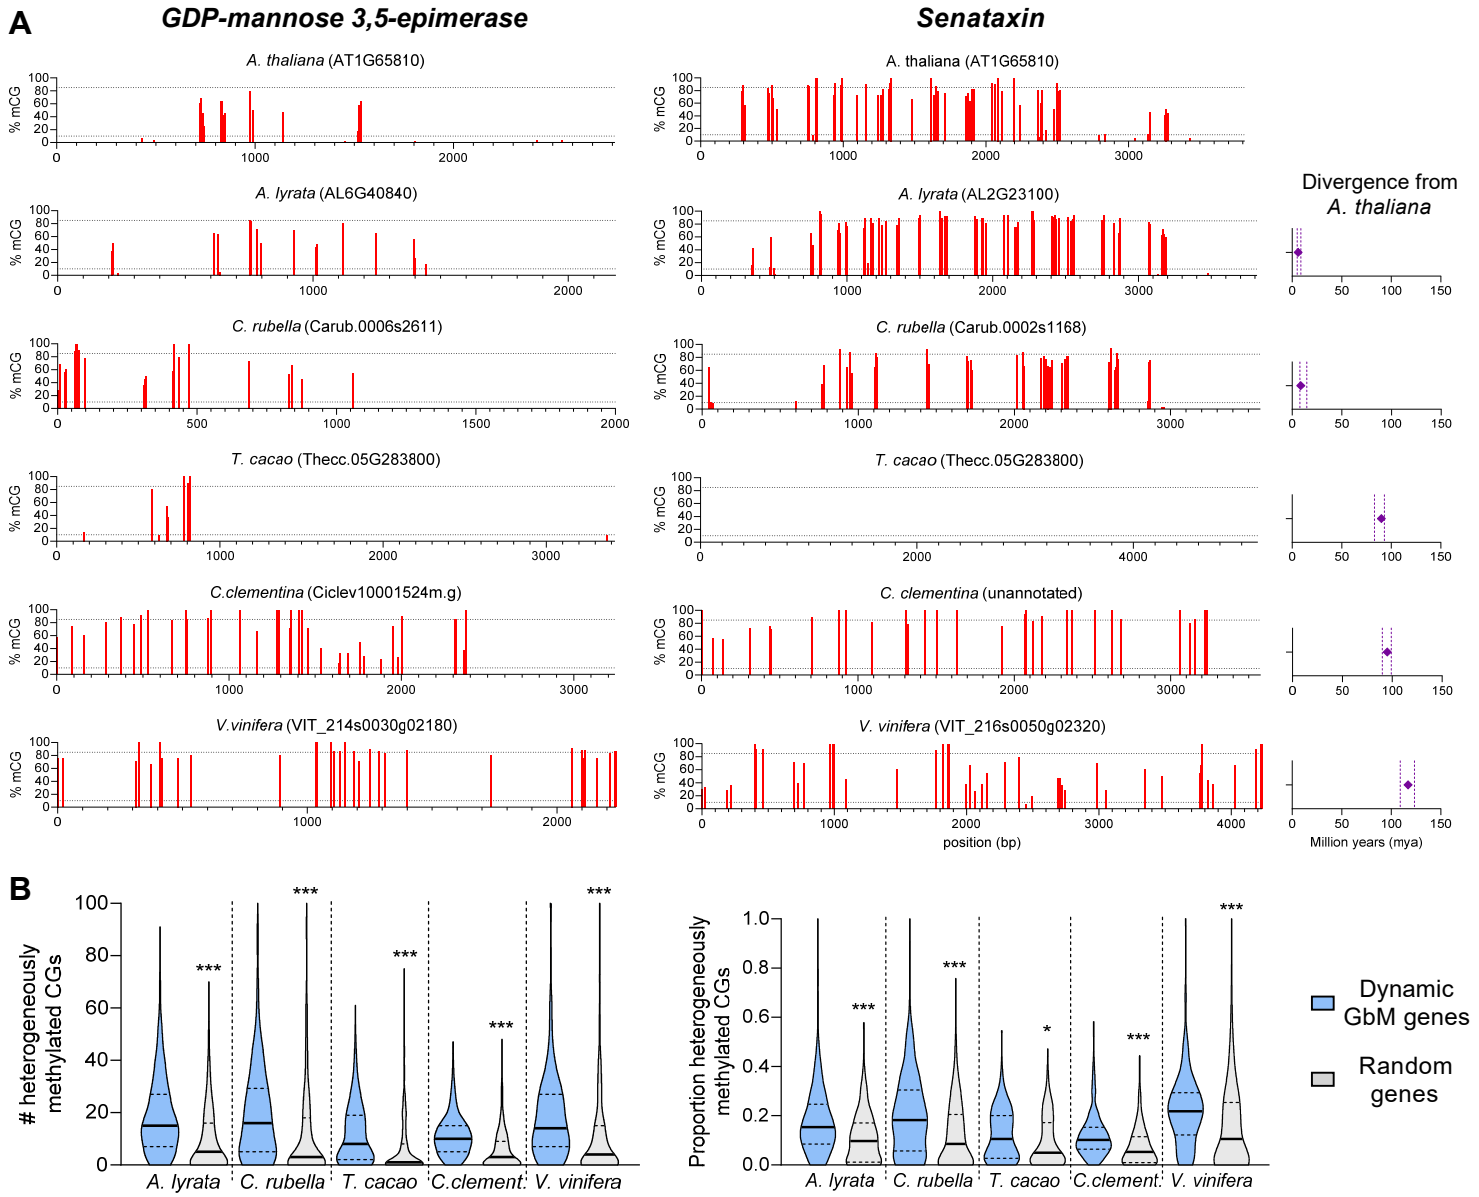

**Figure 4**

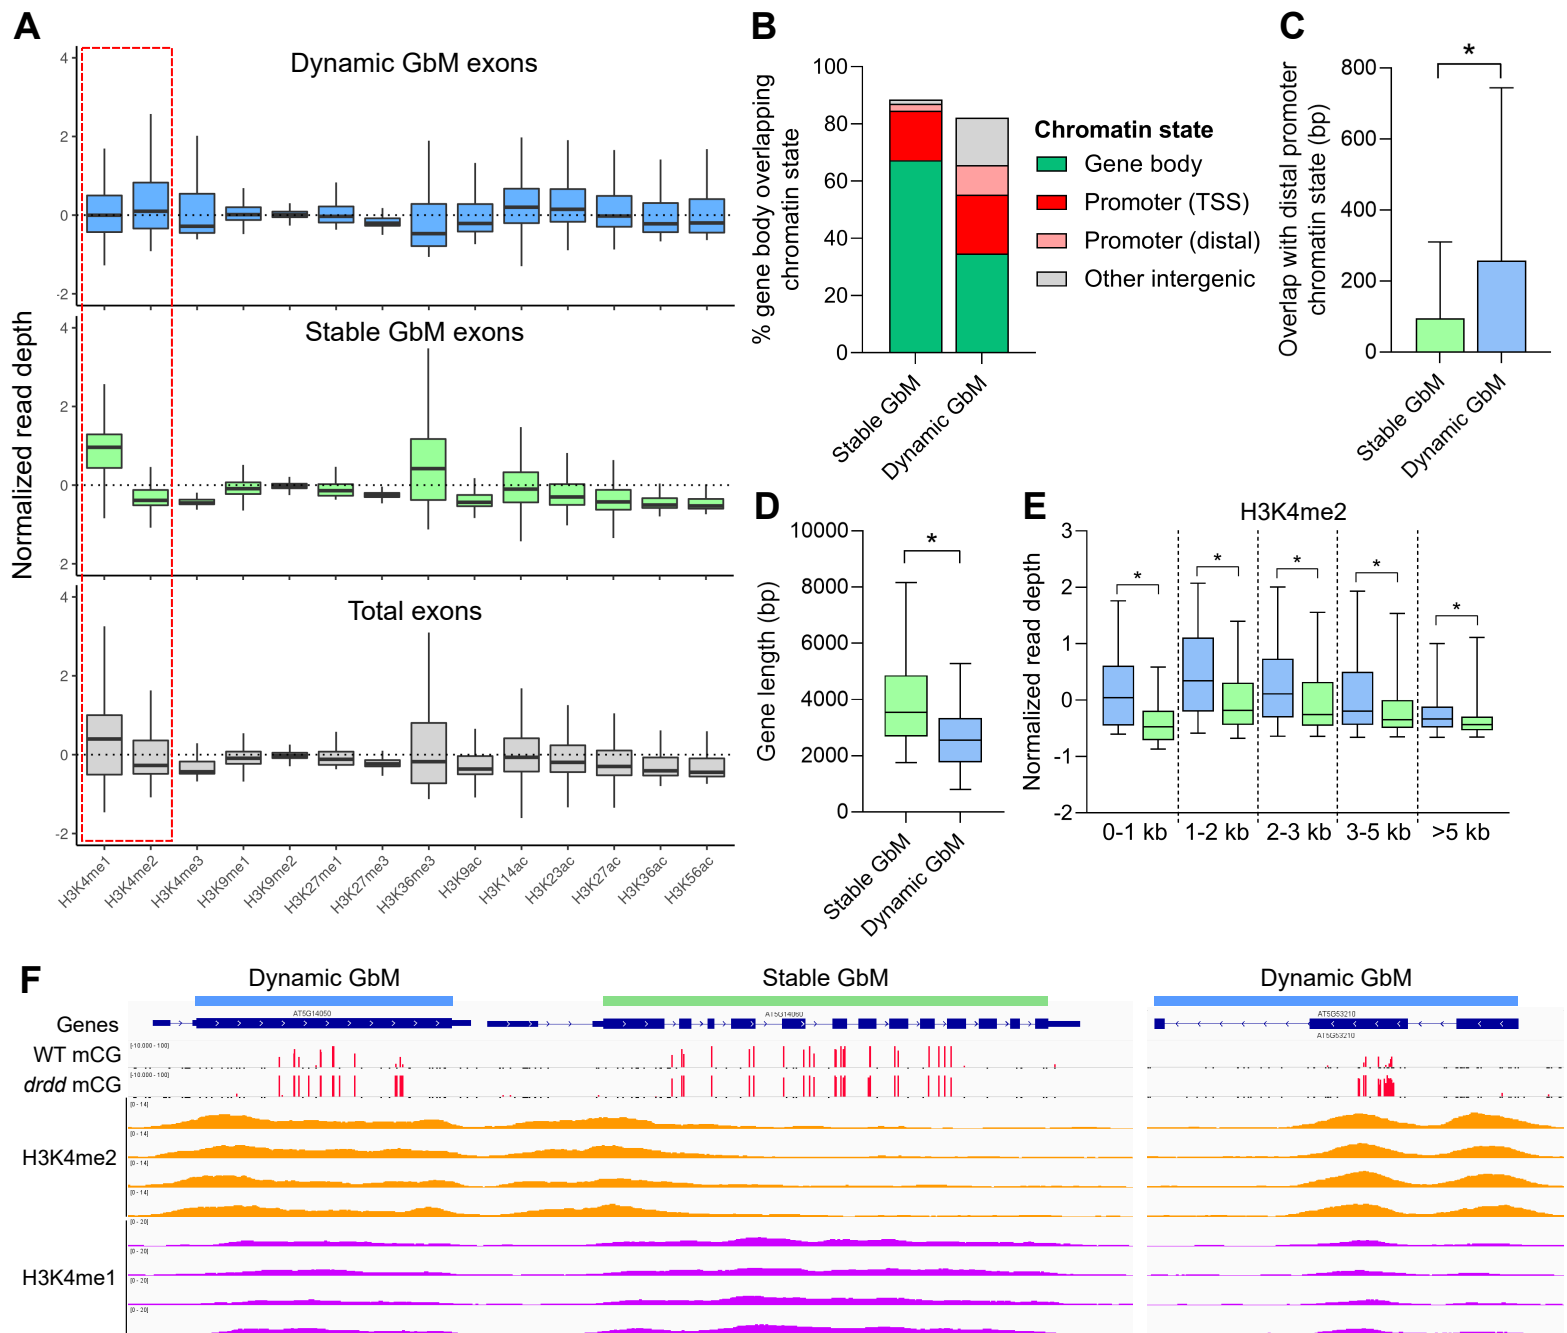

Figure 5

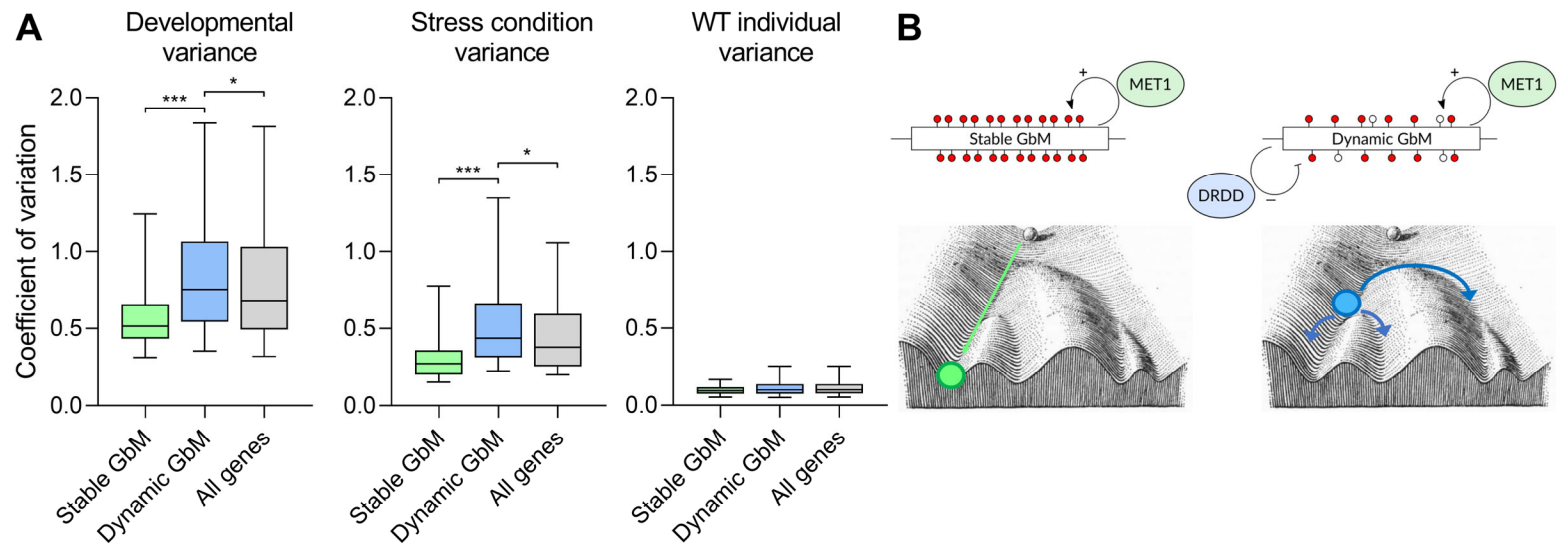

**Figure 6**



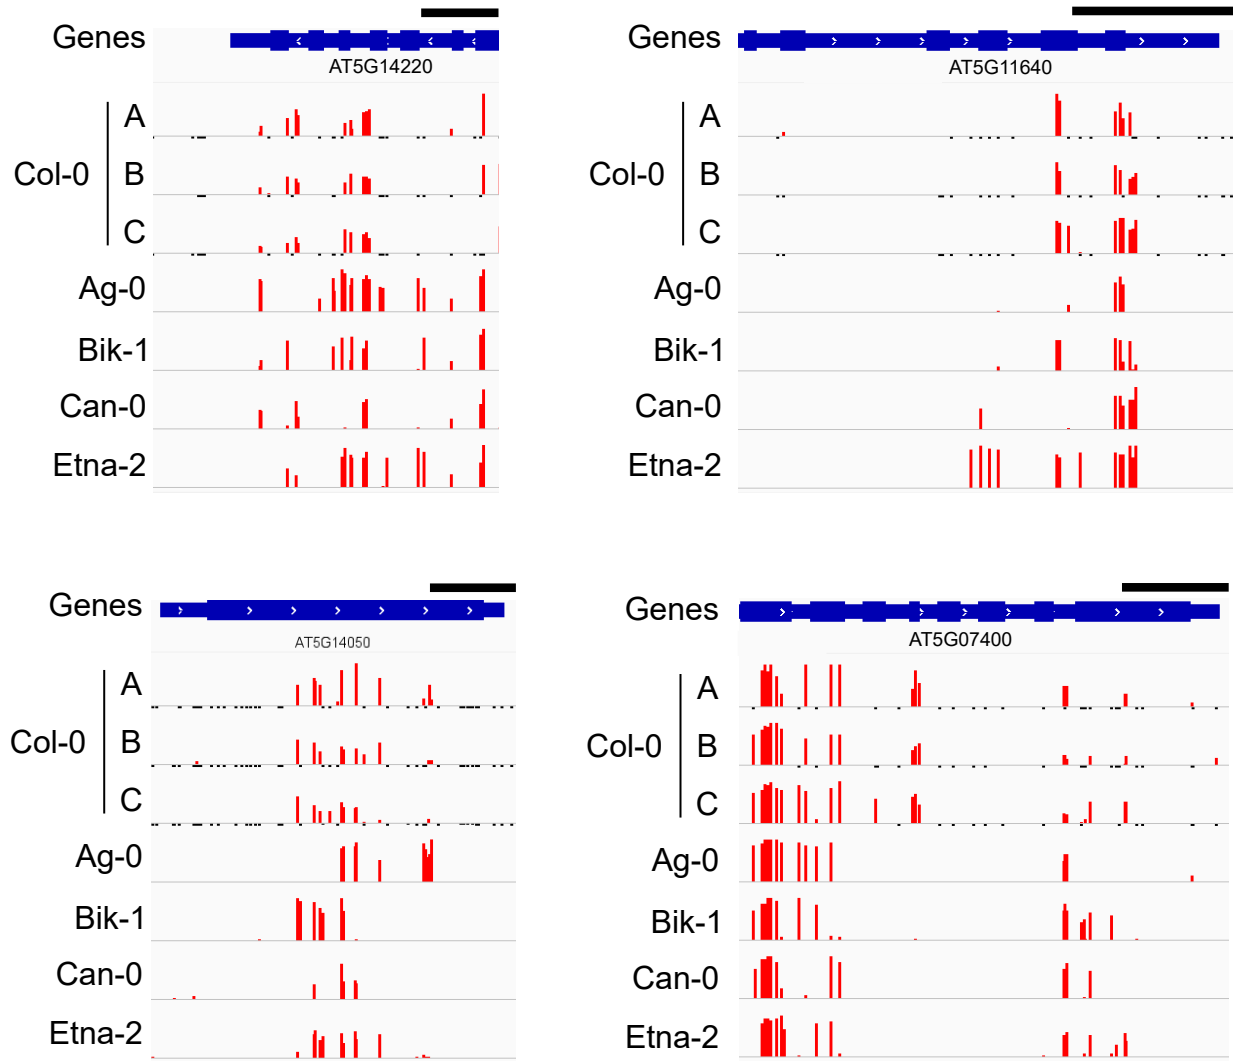

Figure S1

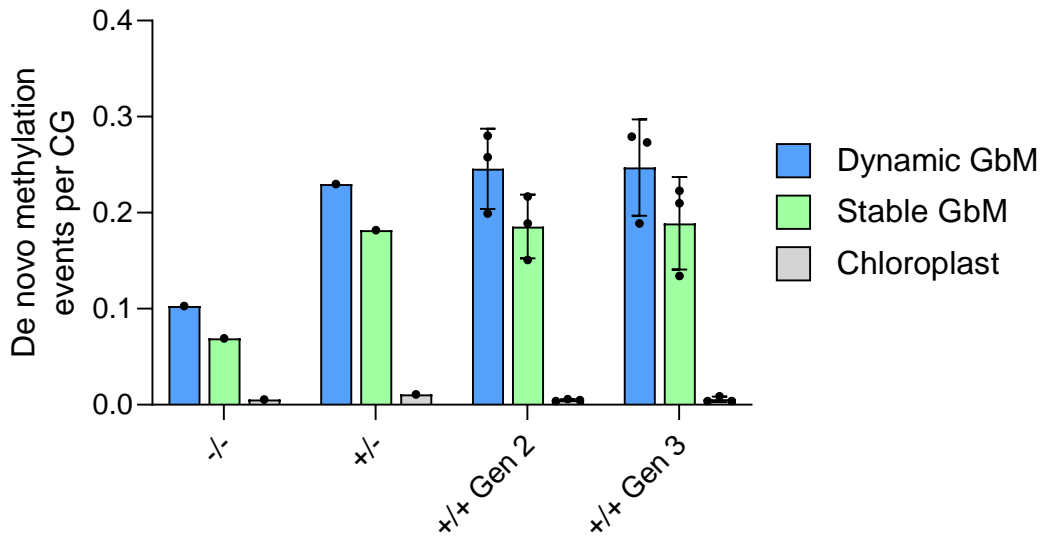

Figure S2

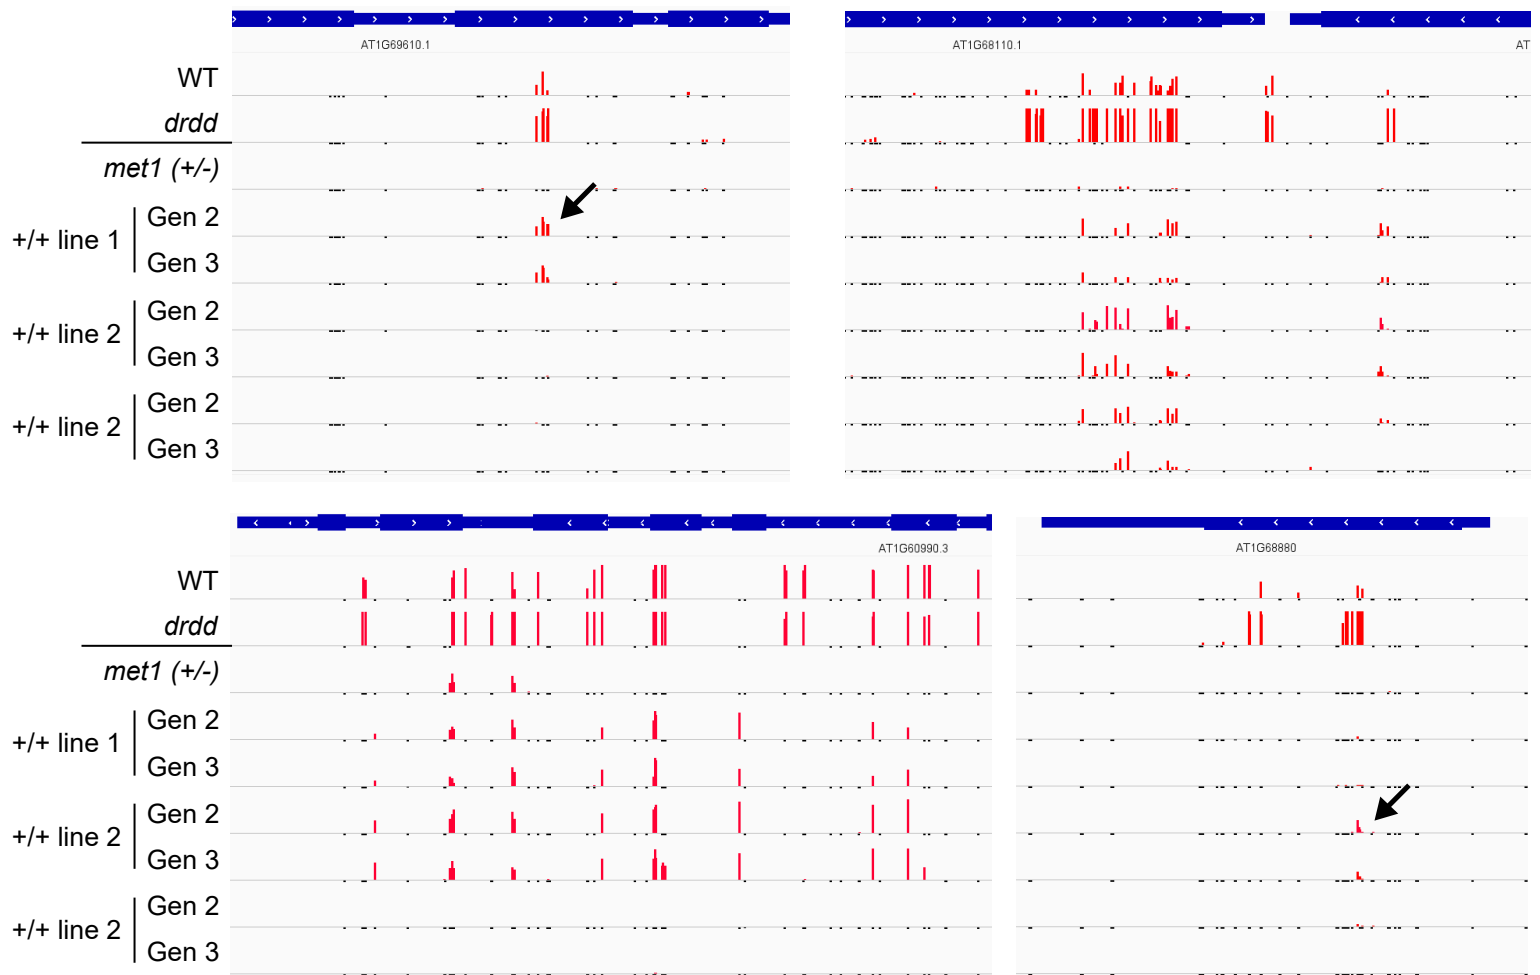

Figure S3

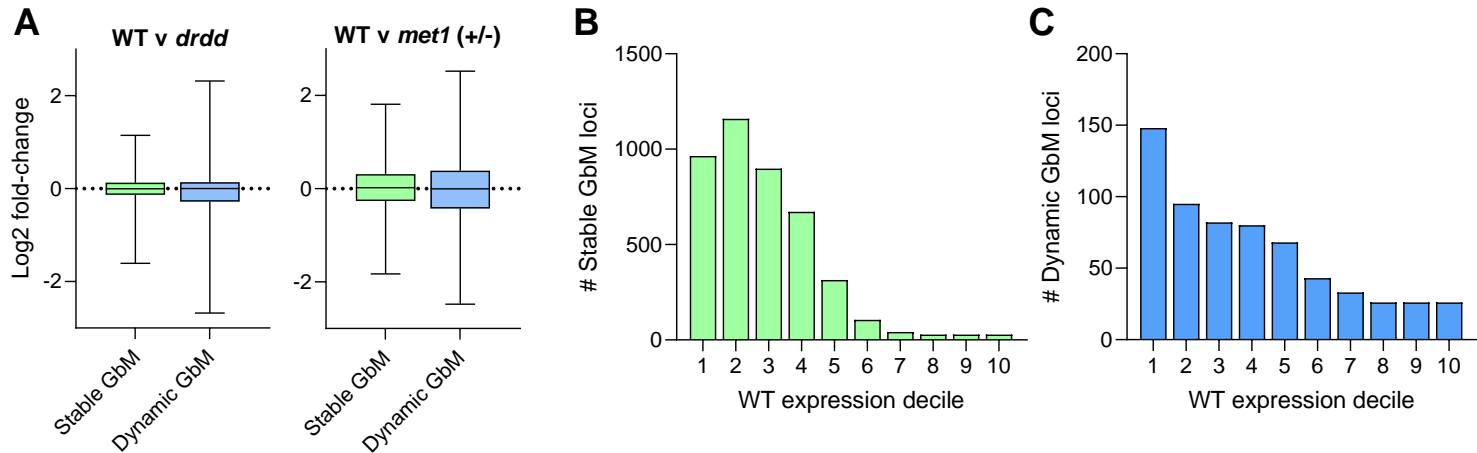

**Figure S4**

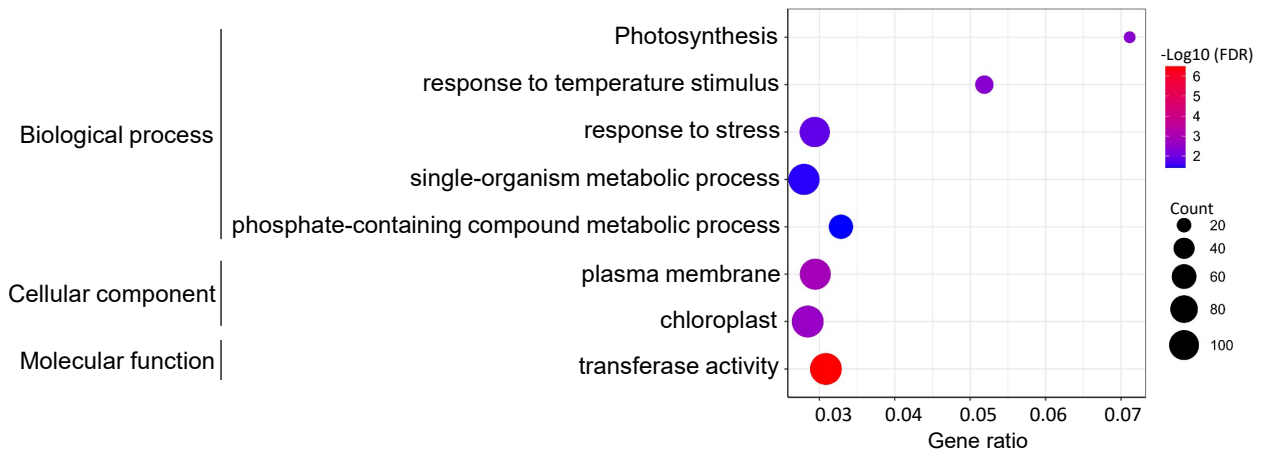

**Figure S5**

### Dynamic GbM

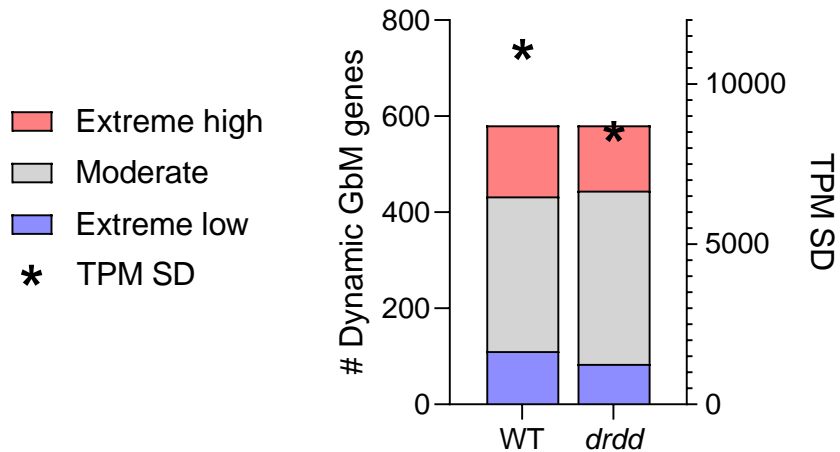

### Stable GbM

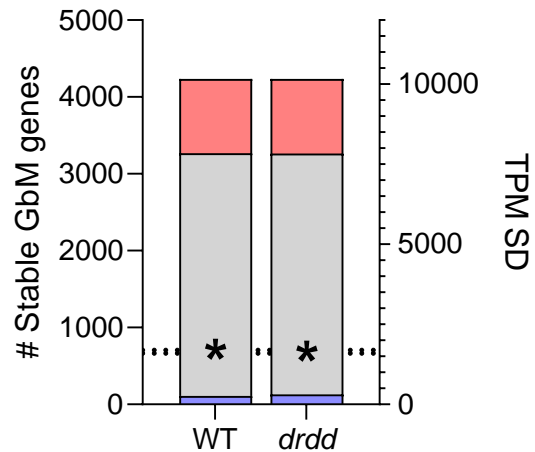

Figure S6
