# Supplementary material for: Dynamic DNA methylation turnover in gene bodies is associated with enhanced gene expression plasticity in plants
Source: bioRxiv or medRxiv preprint supplement (doi:10.1101/2022.12.02.518885), 2023-09-14
Supplement: Supplementary file [file media-1.pdf]

**Table S1: properties of EM-seq libraries sequenced in this study**

| <b>Sample</b>                         | <b>Tissue</b> | <b>Cycles</b> | <b>Total reads</b> | <b>Total reads after QC</b> | <b>Uniquely mapping reads after deduplication</b> | <b>% Reads uniquely mapping</b> | <b>Conversion rate</b> |
|---------------------------------------|---------------|---------------|--------------------|-----------------------------|---------------------------------------------------|---------------------------------|------------------------|
| <i>met1-3</i> heterozygote            | leaf          | 150x150       | 60,407,565         | 57,704,567                  | 30,318,827                                        | 52.6                            | 99.998                 |
| <i>met1-3</i> WT segregant, line 1 F2 | leaf          | 150x150       | 59,741,235         | 56,772,575                  | 32,355,357                                        | 57.1                            | 99.9978                |
| <i>met1-3</i> WT segregant, line 1 F3 | leaf          | 150x150       | 53,407,468         | 53,362,670                  | 22,649,572                                        | 42.4                            | 99.999                 |
| <i>met1-3</i> WT segregant, line 2 F2 | leaf          | 150x150       | 50,522,623         | 50,465,956                  | 25,117,695                                        | 40                              | 99.9989                |
| <i>met1-3</i> WT segregant, line 2 F3 | leaf          | 150x150       | 57,417,384         | 55,601,549                  | 32,596,017                                        | 58.6                            | 99.9978                |
| <i>met1-3</i> WT segregant, line 3 F2 | leaf          | 150x150       | 54,398,483         | 54,337,350                  | 24,958,077                                        | 45.9                            | 99.999                 |
| <i>met1-3</i> WT segregant, line 3 F3 | leaf          | 150x150       | 55,237,611         | 55,193,429                  | 26,779,936                                        | 48.5                            | 99.9989                |
